1

2

3

4

5

6

## SURVIVING HYPOTHERMIA BY FERRITIN-MEDIATED IRON DETOXIFICATION

7

8

9

10 Tina Pecec <sup>1,2,6</sup>, Jaroslaw Lewandowski <sup>3,6</sup>, Alicja A. Komur <sup>3,6</sup>, Daria Sobanska <sup>3</sup>, Yanwu  
11 Guo <sup>4</sup>, Karolina Świtońska-Kurkowska <sup>3</sup>, Marcin Frankowski <sup>5</sup>, Maciej Figiel <sup>3</sup>, and Rafal  
12 Ciosk <sup>3,4,\*</sup>

13

14

15

16 <sup>1</sup> Friedrich Miescher Institute for Biomedical Research, Maulbeerstrasse 66, 4058 Basel,  
17 Switzerland

18 <sup>2</sup> University of Basel, Faculty of Natural Sciences, Klingelbergstrasse 70, 3026 Basel,  
19 Switzerland

20 <sup>3</sup> Institute of Bioorganic Chemistry, Polish Academy of Sciences, Noskowskiego 12/14, 61-  
21 704 Poznań, Poland

22 <sup>4</sup> University of Oslo, Department of Biosciences, Blindernveien 31, Oslo, Norway

23 <sup>5</sup> Adam Mickiewicz University Poznan, Faculty of Chemistry, Uniwersytetu Poznańskiego 8,  
24 61-614 Poznań, Poland

25 <sup>6</sup> These authors contributed equally

26

27 \* Correspondence: rafal.ciosk@ibv.uio.no

28 **SUMMARY**

29 How animals rewire cellular programs to survive cold is a fascinating problem with potential  
30 biomedical implications, ranging from emergency medicine to space travel. Studying a  
31 hibernation-like response in the free-living nematode *Caenorhabditis elegans*, we uncovered  
32 a regulatory axis that enhances the natural resistance of nematodes to severe cold. This  
33 axis involves conserved transcription factors, DAF-16/FoxO and PQM-1, which jointly  
34 promote cold survival by upregulating FTN-1, a protein related to mammalian Fth1/ferritin.  
35 Moreover, we show that inducing expression of Fth1 also promotes cold survival of  
36 mammalian neurons, a cell type particularly sensitive to deterioration in hypothermia. Our  
37 findings in both animals and cells suggest that FTN-1/Fth1 facilitates cold survival by  
38 detoxifying ROS-generating iron species. We finally show that mimicking the effects of FTN-  
39 1/Fth1 with drugs protects neurons from cold-induced degeneration, opening a potential  
40 avenue to improved treatments of hypothermia.

41

42

43 **Keywords:**

44 Hypothermia, hibernation, cold, neuroprotection, FTN-1, Fth1, ferritin heavy chain,  
45 ferroxidase, iron, Fe<sup>2+</sup>, ferrous iron, ROS, antioxidant, DAF-16, FoxO, PQM-1, ETS-4

46

## 47 INTRODUCTION

48 Cold is a potentially lethal hazard. Nonetheless, hibernation is a widespread phenomenon,  
49 used by animals to survive periods of low energy supply associated with cold <sup>1-4</sup>. Although  
50 humans do not hibernate, some primates do so <sup>5</sup>, hinting that a hibernation-like state might,  
51 one day, be induced also in humans, with fascinating medical repercussions <sup>6,7</sup>. Nowadays,  
52 cooling is used widely in organ preservation for transplantation. Therapeutic hypothermia is  
53 also applied, among others, during stroke or trauma, helping preserve functions of key  
54 organs, like the brain or heart <sup>8,9</sup>. Cellular responses to cold are also of interest for longevity  
55 research, as both poikilotherms (animals with fluctuating body temperature, like flies and  
56 fish) and homeotherms (like mice) live longer at lower temperatures <sup>10, 11</sup>. Therefore,  
57 understanding the molecular underpinnings of cold resistance has the potential to transform  
58 several areas of medicine.

59 The free-living nematode *C. elegans* populates temperate climates <sup>12</sup>, indicating that  
60 these animals can survive spells of cold. In laboratories, *C. elegans* are typically cultivated  
61 between 20-25°C, and a moderate temperature drop slows down, but does not arrest, these  
62 animals <sup>13, 14</sup>. Deep cooling of *C. elegans*, i.e. to near-freezing temperatures, remains less  
63 studied. Exposing nematodes to 2-4°C, after transferring them directly from 20-25°C (which  
64 we refer to as “cold shock”), results in the death of most animals within one day of  
65 rewarming <sup>15-17</sup>. However, the lethal effects of cold shock can be prevented when animals  
66 are first subjected to a transient “cold acclimatization/adaptation” at an intermittent  
67 temperature of 10-15°C <sup>15, 17</sup>. Such cold-adapted nematodes can survive near-freezing  
68 temperatures for many days <sup>15, 17-19</sup>. While in the cold, the nematodes stop aging, suggesting  
69 that they enter a hibernation-like state <sup>17</sup>.

70 Among factors promoting *C. elegans* survival in near-freezing temperatures, we  
71 identified a ribonuclease, REGE-1, homologous to the human Regnase-1/MCPIP1 <sup>17, 20</sup>. In  
72 addition to ensuring cold resistance, REGE-1 promotes the accumulation of body fat, which

73 depends on the degradation of mRNA encoding a conserved transcription factor, ETS-4<sup>17</sup>.  
74 Interestingly, previous studies showed that the loss of ETS-4 synergizes with the inhibition of  
75 insulin signaling in extending lifespan<sup>21</sup>, and that the inhibition of insulin pathway  
76 dramatically enhances cold survival<sup>15, 19</sup>. Combined, these observations suggested that the  
77 cold survival-promoting function of REGE-1 could be related to the inhibition of ETS-4/insulin  
78 signaling axis. Here, we validate that hypothesis, dissect the underlying mechanism, and  
79 demonstrate that its main objective is the detoxification of harmful iron species. We find that  
80 a similar mechanism appears to protect from cold also mammalian cells. By mimicking its  
81 effects with drugs, we highlight potential benefits of iron management for treating  
82 hypothermia, for which no robust drug treatment currently exists.

83

84

85

86

87

88 **RESULTS**

89

90 **Inhibition of ETS-4 improves *C. elegans* survival in the cold**

91 Our initial studies of *C. elegans* “hibernation” identified the RNase REGE-1 as a factor  
92 promoting cold survival<sup>17</sup>. Studying REGE-1 in a different physiological context, the  
93 regulation of body fat, we showed that a key target of REGE-1 encodes a conserved  
94 transcription factor, ETS-4<sup>17</sup>. Thus, we asked whether overexpression of ETS-4, taking  
95 place in *rege-1(-)* mutants, is also responsible for the cold sensitivity of *rege-1(-)* mutants.  
96 We tested that by incubating animals at 4°C, henceforth simply the “cold” (for details on cold  
97 survival assay see Fig. 1A). Indeed, we found that *rege-1(-); ets-4(-)* double mutants  
98 survived cold much better than *rege-1(-)* single mutants (Fig. 1B). Unexpectedly, we  
99 observed that the double mutants survived cold even better than wild type (Fig. 1B).  
100 Intrigued, we additionally examined the *ets-4(-)* single mutants and found that they survived  
101 cold as well as the double mutants (Fig. 1B). Thus, inhibiting ETS-4 is beneficial for cold  
102 survival irrespective of REGE-1. This observation was somewhat surprising as, in wild type,  
103 REGE-1 inhibits ETS-4 by degrading its mRNA. However, we observed that, in wild type,  
104 both ETS-4 protein and *ets-4* mRNA were more abundant in the cold (Fig. S1A-B). Thus, an  
105 incomplete/inefficient degradation of *ets-4* mRNA in the cold could explain the enhanced  
106 cold survival of *ets-4(-)* mutants.

107 Because many hibernators burn fat to fuel survival in the cold, the ETS-4-mediated  
108 fat loss<sup>17</sup> and cold sensitivity (reported here), observed in *rege-1(-)* mutants, could be  
109 connected. However, we found that inhibiting ETS-4 restores body fat of *rege-1(-)* mutants to  
110 only wild-type levels<sup>17</sup>, and yet the *rege-1(-); ets-4(-)* double mutants are more resistant to  
111 cold than wild type (Fig. 1B). We additionally examined the fat content of *ets-4(-)* single  
112 mutants and found that it was indistinguishable from wild-type (Fig. 1C). Thus, ETS-4  
113 appears to impact body fat and cold resistance via separate mechanisms.

114

115 **The enhanced cold survival requires both DAF-16 and PQM-1**

116 ETS-4 was previously described to synergize with the insulin/IGF-1 signaling pathway in  
117 limiting the nematode lifespan<sup>21</sup>. Moreover, the lifespan extension seen in *ets-4(-)* mutants,  
118 as is the case with insulin pathway mutants, depends on the transcription factor DAF-  
119 16/FOXO<sup>21, 22</sup>. These and additional reports, that insulin pathway mutants display cold  
120 resistance depending on DAF-16<sup>15, 19</sup>, prompted us to examine the genetic relationship  
121 between *ets-4(-)* and insulin pathway mutants in the context of cold resistance. Firstly,  
122 using a loss-of-function allele of the insulin-like receptor, *daf-2(e1370)*<sup>23</sup>, we confirmed that  
123 inhibiting insulin signaling improves cold survival (Fig. S1C). Combining this *daf-2* mutation  
124 with *ets-4(-)*, we observed that the double mutants survived cold slightly better than the *daf-2*  
125 single mutant (Fig. S1C). However, the difference between *daf-2(e1370); ets-4(-)* and *daf-2(e1370)*  
126 mutants was smaller than the difference between *ets-4(-)* mutant and wild type,  
127 suggesting a partial overlap between mechanisms activated upon the inhibition of DAF-2 or  
128 ETS-4.

129 The partial overlap suggests that ETS-4 may affect insulin signaling “downstream”  
130 from the DAF-2 receptor. The main components of the *C. elegans* insulin pathway include  
131 the phosphoinositide 3-kinase AGE-1/PI3K, which is why we also tested the genetic  
132 relationship between *age-1* and *ets-4* mutations. Using the *age-1(hx546)* allele, carrying a  
133 point mutation reducing the AGE-1 activity<sup>24</sup>, we confirmed that also the *age-1(-)* mutants  
134 survive cold better than the wild type, and that their improved survival depends on the  
135 transcription factor DAF-16/FOXO (Fig. S1D). Then, we examined the epistatic relationship  
136 between *age-1(hx546)* and *ets-4(-)* mutants. While the *age-1(hx546)* single mutants survived  
137 cold, expectedly, much better than wild type (Fig. 1D), we observed no additional benefit of  
138 combining *age-1(hx546)* and *ets-4(-)* mutations (Figs. 1D and S1D). These observations  
139 suggest that AGE-1 could act in the same pathway as ETS-4, or alternatively converge on

140 the same downstream effector(s). Thus, we also examined whether the enhanced cold  
141 survival of *ets-4(-)* mutants depends on DAF-16. Indeed, we found that removing DAF-16  
142 completely suppressed the enhanced cold survival of *ets-4(-)* mutants (Fig. 1E). Reconciling  
143 all observations, we hypothesize that, in wild type, signals generated upon DAF-2 or ETS-4  
144 activation converge on AGE-1, thus inhibiting DAF-16 and limiting cold resistance.  
145 Conversely, upon the inactivation of DAF-2 or ETS-4, DAF-16 activation results in improved  
146 cold resistance.

147         Recently, another transcription factor, PQM-1, was shown to complement DAF-16 in  
148 promoting the lifespan in DAF-2 deficient animals<sup>25</sup>. In the intestinal cells, PQM-1 and DAF-  
149 16 nuclear occupancy has been shown to be mutually exclusive, and they appear to regulate  
150 largely separate sets of target genes<sup>25</sup>. Additionally, these transcription factors can play  
151 opposing roles; for example, while the formation of an alternative “dauer” larval stage  
152 (deployed to survive adverse environmental conditions) depends on DAF-16<sup>22</sup>, PQM-1  
153 facilitates the recovery from the dauer arrest<sup>25</sup>. Yet there is also some evidence supporting  
154 synergistic roles of DAF-16 and PQM-1. For example, both the class I and II genes (see the  
155 introduction) are down-regulated in *pqm-1* mutants<sup>25</sup>, and DAF-16 and PQM-1 both  
156 contribute to the lifespan extension of *daf-2* or mitochondrial mutants<sup>25,26</sup>. Thus, at least in  
157 certain circumstances, DAF-16 and PQM-1 may collaborate. Therefore, we tested whether  
158 the loss of PQM-1 had a similar effect on the cold survival of *ets-4(-)* mutants as the loss of  
159 DAF-16, and observed that, indeed, removing PQM-1 suppressed the enhanced cold  
160 survival of *ets-4(-)* mutants (Fig. 1F). Importantly, in otherwise wild-type background, we  
161 observed no apparent effects on cold survival in either *pqm-1(-)* or *daf-16(-)* single mutants,  
162 nor in the *pqm-1(-); daf-16(-)* double mutants (Fig. S1E). Even the survival of *daf-16(-); pqm-*  
163 *1(-); ets-4(-)* triple mutants was indistinguishable from wild-type nematodes (Fig. 1F).  
164 Together, these observations argue for a specific, joint role for DAF-16 and PQM-1 in cold  
165 survival, under conditions that favor their activation, such as upon ETS-4 inactivation.

166

167 **DAF-16 and PQM-1 are enriched in the gut nuclei in the cold**

168 Presumably, DAF-16 and PQM-1 facilitate cold survival by inducing transcription of specific  
169 genes. Under normal growth conditions, DAF-16 remains inactive in the cytoplasm.  
170 However, when insulin signaling is inhibited, DAF-16 moves to the nucleus to activate target  
171 genes. Based on the genetic analysis above, we suspected the nuclear accumulation of  
172 DAF-16 in *ets-4(-)* mutants. To examine that, we attached (by CRISPR/Cas9 editing) a GFP-  
173 FLAG tag to the C-terminal end of the endogenous *daf-16* ORF (see Methods). Examining  
174 the distribution of GFP-tagged DAF-16 (DAF-16::GFP), we observed little nuclear signal at  
175 20°C, possibly with a minimal increase in the absence of ETS-4. After one or three days at  
176 4°C, however, we observed a significant increase in the nuclear DAF-16::GFP (Fig. 2A and  
177 C); that increase appeared to be posttranscriptional, as *daf-16* mRNA levels remained  
178 constant between 20°C and 4°C (Fig. S2A). Although the nuclear DAF-16::GFP signal  
179 appeared slightly stronger in *ets-4(-)* mutants at day one in the cold, that was no longer true  
180 at day 3 (Fig. 2A and C). Thus, although the nuclear enrichment of DAF-16 is consistent with  
181 its ability to potentiate cold resistance, that enrichment is, apparently, insufficient, as it only  
182 enhances cold survival in *ets-4(-)* mutants but not wild type.

183 Thus, we performed the same analysis on PQM-1, fusing (by CRISPR/Cas9 editing)  
184 an mCHERRY-MYC tag to the C-terminal end of the endogenous *pqm-1* ORF (see  
185 Methods). We detected little, if any, nuclear PQM-1::mCHERRY at 20°C, in either wild-type  
186 adult nematodes or *ets-4(-)* mutants (Fig. 2B-C), agreeing with the previously reported  
187 expression patterns<sup>25, 27-29</sup>. By contrast, after one day at 4°C, we began detecting the  
188 nuclear PQM-1::mCHERRY signal in wild-type nematodes, and a slightly stronger signal in  
189 the nuclei of *ets-4(-)* mutants (Fig. 2B-C); this increase may be transcriptional, as *pqm-1*  
190 mRNA levels were higher at 4°C than 20°C (Fig. S2B). After three days at 4°C, the PQM-  
191 1::mCHERRY nuclear signal increased even further (Fig. 2B-C) and, at this point, *ets-4(-)*



192 mutants displayed significantly higher signal than wild type (Fig. 2B-C). Thus, in contrast to  
193 the standard cultivation temperature, where DAF-16 and PQM-1 localize to the nucleus in a  
194 mutually exclusive manner <sup>25</sup>, DAF-16 and PQM-1 coexist in the nucleus in the cold.  
195 Intriguingly, DAF-16 and PQM-1 induce FTN-1 in *ets-4* mutants but not wild type. Thus, one  
196 possibility is that the additional accumulation of PQM-1 (observed in the absence of ETS-4)  
197 is required to reach a threshold for DAF-16 activation. Among other possibilities, DAF-16  
198 activation could involve additional factors normally inhibited by ETS-4.

199

### 200 **Identification of a PQM-1 and DAF-16 coregulated gene promoting cold survival**

201 The above observations are compatible with a scenario where, upon ETS-4 inactivation,  
202 DAF-16 and PQM-1 coregulate transcription of cold survival-promoting gene(s). To test this  
203 hypothesis, we undertook a functional genomic approach. First, we compared gene  
204 expression (by RNAseq) between *ets-4(-)* and wild-type animals incubated at 4°C. Then, by  
205 comparing *pqm-1(-); ets-4(-)*, or *daf-16(-); ets-4(-)* double mutants to the *ets-4(-)* single  
206 mutant, we identified genes, whose expression in the *ets-4(-)* mutant depends on PQM-1  
207 and/or DAF-16. To illustrate this, we prepared an integrative heat-map, using all 4°C  
208 samples with replicates. Focusing on changes between the strains, we observed 3 distinct  
209 clusters (Fig. S3A). Cluster 1 (red) includes genes upregulated in the cold in *ets-4(-)* mutants  
210 (compared to wild type), which either do not change or go down, upon the additional  
211 inhibition of *daf-16* or *pqm-1*. Cluster 2 (green) includes genes upregulated across all  
212 conditions. Finally, the smallest cluster 3 (blue), includes genes downregulated in *ets-4(-)*  
213 mutants, which either do not change or go up, upon the additional inhibition of *daf-16* or  
214 *pqm-1*. With this analysis, we observed that many changes in gene expression upon the loss  
215 of ETS-4, were reverted upon the additional loss of either DAF-16 or PQM-1, supporting a  
216 functional relationship between DAF-16 and PQM-1. Taking advantage of the ENCODE  
217 database, which reports genome-wide chromatin association of many transcription factors <sup>30</sup>,

218 we examined the potential binding of DAF-16 and PQM-1 around the transcription start sites  
219 (TSS) of genes in each cluster of the heat map. Even though the ENCODE data comes from  
220 experiments performed at standard growth conditions, we decided to use it as an  
221 approximation, and observed that genes, whose expression in *ets-4(-)* mutants depends on  
222 DAF-16 or PQM-1 (i.e. genes in clusters 1 and 3), appear to be enriched for TSS-proximal  
223 binding sites for both transcription factors (Fig. S3A). The same enrichment was not seen for  
224 the cluster 2 genes, whose expression is apparently unrelated to DAF-16 or PQM-1 (Fig.  
225 S3A). The possible connection between clusters 1 and 3, and the association with DAF-16  
226 or PQM-1, was statistically significant for PQM-1 but not DAF-16 (Fig. S3A). Nevertheless,  
227 by analyzing transcription factor binding motifs enriched within each gene cluster, we  
228 observed a DAF-16-like motif enriched within cluster 1 genes (Fig. S3B), which made us  
229 focus on those genes.

230 To identify candidate genes, whose DAF-16 and PQM-1 dependent activation  
231 promotes cold survival, we first selected genes upregulated (in both biological replicates), at  
232 least two-fold, in *ets-4(-)* mutants compared to wild type (after one day at 4°C). Second, we  
233 intersected these genes with those whose promoters associate with either DAF-1 or PQM-1,  
234 according to the confident binding sites from Tepper et al. This analysis yielded seven genes  
235 that were reproducibly upregulated in *ets-4(-)* mutants, and whose promoters may associate  
236 with both PQM-1 and DAF-16 (Fig. 3A). If these genes were relevant for the enhanced cold  
237 survival, their inhibition would be expected to impede cold survival of *ets-4(-)* mutants.  
238 Testing this, we observed that RNAi-mediated depletion of one candidate, *ftn-1* (encoding a  
239 nematode ferritin), reproducibly compromised cold survival of *ets-4(-)* mutants (Fig. 3B; note  
240 that the RNAi construct is predicted to target also *ftn-2*, which is highly similar to *ftn-1*, see  
241 below).

242

243 **FTN-1/Ferritin promotes cold survival**

244 Iron is an essential but also a potentially harmful element, whose cellular levels are tightly  
245 regulated by various molecular mechanisms, which are largely conserved between  
246 nematodes and humans<sup>31,32</sup>. Among critical iron regulators are iron-binding proteins called  
247 ferritins. In *C. elegans*, ferritin is encoded by two genes, *ftn-1* and *ftn-2*. Under standard  
248 growth conditions, *ftn-2* mRNA is much more abundant than *ftn-1*<sup>33-35</sup>. While *ftn-1* was  
249 previously shown to be upregulated upon DAF-2 inactivation, in a DAF-16 dependent  
250 manner, *ftn-2* is not considered a DAF-16 target<sup>36</sup>. Also, in agreement with their differential  
251 regulation in innate immunity, the expression of *ftn-1*, but not *ftn-2*, was reported to depend  
252 on PQM-1<sup>28</sup>. Confirming our RNA profiling data by RT-qPCR, and consistent with the  
253 regulation by both DAF-16 and PQM-1, we observed a DAF-16 and PQM-1 dependent  
254 increase in the levels of *ftn-1* mRNA in cold-treated *ets-4(-)* mutants (Fig. 3C-D). Because  
255 the RNAi construct targets both *ftn-1* and *ftn-2*, we also examined FTN-1 function using an  
256 existing loss-of-function allele, *ftn-1(ok3625)*<sup>37,38</sup>. Since DAF-16 and PQM-1 are important  
257 for cold survival in *ets-4(-)*, but not wild-type animals, their relevant target may be expected  
258 to display a similar behavior. Indeed, the cold survival of *ftn-1(-)* single mutants was  
259 indistinguishable from wild type (Fig. 4A), but the *ftn-1* inactivation completely abolished the  
260 enhanced cold survival of *ets-4(-)* mutants (Fig. 4A). Importantly, FTN-1 is expressed in the  
261 intestine<sup>34</sup>, i.e. the tissue where ETS-4, DAF-16 and PQM-1 are all expressed.

262 If the cold survival-enhancing role of FTN-1 is related, as expected, to its function in  
263 iron regulation, excess iron may be expected to impede cold survival. We tested that by  
264 supplementing culture plates with ferric ammonium citrate (FAC). Although we do not know  
265 how much extra iron is being absorbed by FAC-treated animals, we observed a dose-  
266 dependent impediment of cold survival (Fig. S4A). Importantly, although higher FAC levels  
267 reduced the survival of *ets-4(-)* mutants, their survival was still greater than of the  
268 corresponding (i.e. FAC-treated) wild type (Fig. S4B). The better survival of FAC-treated *ets-*  
269 *4(-)* mutants still depended on FTN-1, as the *ftn-1(-); ets-4(-)* double mutants responded to

270 excess iron like the corresponding wild type (Fig. S4B). Combined, our data suggest that  
271 FTN-1, when expressed in cold-treated *ets-4(-)* animals, facilitates survival, and its beneficial  
272 effect involves some form of iron regulation.

273

#### 274 **FTN-1 promotes cold survival through its ferroxidase activity**

275 Mammalian ferritin consists of multiple heavy and light subunits (FTH and FTL) that form  
276 nanocages storing thousands of iron atoms<sup>39</sup>. The *C. elegans* ferritins, FTN-1 and -2, are  
277 more similar to FTH<sup>33</sup>. To test iron sequestration by FTN-1, we used size exclusion  
278 chromatography-inductively coupled plasma-mass spectrometry (SEC-ICP-MS;<sup>38</sup>). We  
279 found that, in cold-treated animals, the levels of total iron were independent of FTN-1 (Figs.  
280 4B, S4C, E) but, as reported at standard temperature<sup>38</sup>, depended on FTN-2 (Figs. 4C,  
281 S4D, E). Thus, FTN-1 appears to contribute little, if at all, to the pool of stored iron.

282 Iron is present in cells in both oxidized Fe<sup>3+</sup>/ferric(III) and reduced Fe<sup>2+</sup>/ferrous(II)  
283 forms. Excess of Fe<sup>2+</sup> is potentially harmful, because, in the so-called Fenton reaction, it  
284 catalyzes the formation of reactive oxygen species, ROS<sup>40,41</sup>. Notably, both FTN-1 and -2  
285 contain predicted ferroxidase active sites, which in homologous proteins mediate the Fe<sup>2+</sup>-to-  
286 Fe<sup>3+</sup> conversion (Figs. 4D and S4F). Accordingly, the *ftn-2; ftn-1* double mutants display an  
287 elevated ratio of Fe<sup>2+</sup>/Fe<sup>3+</sup> during aging<sup>38</sup>. Although the individual impact of FTN-1 on the  
288 Fe<sup>2+</sup>/Fe<sup>3+</sup> balance was not examined, the overexpression of *ftn-1* was reported to have  
289 antioxidant effects<sup>42</sup>. To test whether the ferroxidase activity of FTN-1 promotes cold  
290 survival, we modified the endogenous *ftn-1* locus (by CRISPR/Cas9 editing), so that it  
291 produces a ferroxidase-dead FTN-1. Crucially, inactivation of the FTN-1 ferroxidase activity  
292 completely abolished the enhanced cold survival of *ets-4(-)* animals (Fig. 4E). Thus, FTN-1  
293 appears to facilitate cold survival through iron detoxification, rather than sequestration.

294

#### 295 **Overproduction of FTN-1 is sufficient for the enhanced cold survival**

296 Thus far, we have shown that FTN-1, when expressed in the absence of ETS-4, gives  
297 worms advantage in surviving cold. To test whether FTN-1 may do that in otherwise wild-  
298 type background, we created (using Mos1-mediated Single Copy Insertion, MosSCI; <sup>43</sup>)  
299 strains overexpressing *ftn-1* from two different, robust promoters, *dpy-30* and *vit-5*.  
300 Importantly, we found that both strains survived cold much better than wild type (Fig. 5A; for  
301 the levels of *ftn-1* mRNA overproduced from the *vit-5* promoter see Fig. S5A). By SEC-ICP-  
302 MS, we observed no changes in the levels of ferritin-associated iron in the overexpressing  
303 strains (Figs. 5B and S5B, C), consistent with FTN-1 functioning in iron detoxification and  
304 not sequestration.

305 The ferroxidase activity of FTN-1 is expected to lower the levels of ROS-generating  
306 Fe(II), implying that cold-treated nematodes experience increased levels of ROS. We found  
307 that reagents typically used for ROS detection (like CM-H<sub>2</sub>DCFDA) are toxic to cold-treated  
308 animals. Thus, we sought a factor whose induction could be used as a proxy for ROS  
309 detection. Specific enzymes, called superoxide dismutases (SODs), function at the front line  
310 of cellular defense against ROS <sup>44</sup>. There are five SODs in *C. elegans* and, examining their  
311 expression in cold-treated animals, we noticed a consistent increase in the *sod-5* mRNA. To  
312 understand the dynamics of *sod-5* activation, we examined the expression of GFP-tagged  
313 SOD-5 <sup>45</sup>; the fusion protein is expressed mainly in neurons. Following SOD-5::GFP signal in  
314 live animals, we observed a strong, but transient increase of SOD-5::GFP during rewarming  
315 (Fig. S5D; note the elevated signal around 2 h into rewarming). Focusing thus on this time  
316 point, we tested whether the overexpression of *ftn-1* impacts *sod-5* activation. Indeed, we  
317 observed that the levels of *sod-5* mRNA were significantly lower in the *ftn-1* overexpressing  
318 strain than wild type (Fig. 5C). All observations combined, a picture emerges where FTN-1,  
319 through its iron(II)-detoxifying activity, protects animals from the cold by reducing the levels  
320 of Fe(II)-catalyzed ROS. According to this model, animals subjected to cold experience an  
321 increase in Fe(II) iron. Detection of specific iron forms is not trivial, and our attempts to

322 detect specifically Fe(II) in *C. elegans* were unsuccessful. Thus, assuming some level of  
323 conservation in cellular responses to cold, we decided to investigate that in mammalian  
324 cells, where Fe(II) detection is more robust and potential findings more applicable to human  
325 hypothermia.

326

### 327 **Iron management plays a key role in neuronal resistance to cold**

328 Since the main clinical benefit of deep cooling is the preservation of neuronal functions, we  
329 decided to examine Fe(II) in neurons, where our observations may be of clinical relevance.  
330 For convenience, we chose to study murine neurons. To generate them, we differentiated  
331 primary neuronal stem cells, collected from early mouse embryos, into noradrenergic-like  
332 neurons (henceforth “neurons”), which affect numerous physiological functions, generally  
333 preparing the body for action. To examine their cold resistance, neurons (cultivated at the  
334 physiological temperature of 37°C) were shifted to 10°C for 4 hours and then returned to  
335 37°C. Their viability was examined after rewarming for 24 hours (see Methods for details).  
336 First, we observed that cooling induced cell death in a large fraction of neurons (Fig. 6A).  
337 Interestingly, neuronal death was associated with rewarming (Fig. S6A), which is somewhat  
338 reminiscent of reperfusion injury, arguing that not the cold *per se*, but rather the burden  
339 associated with restoring cellular functions during rewarming, is the critical challenge facing  
340 cold-treated neurons.

341 A recent study compared cold survival of neurons derived from either hibernating or  
342 non-hibernating mammals, and reported that “hibernating” neurons survive cold much better  
343 than “non-hibernating” ones<sup>46</sup>. Thus, hibernating neurons appear to possess intrinsic  
344 mechanisms enhancing cold resistance. Remarkably, treating non-hibernating neurons with  
345 certain drugs was shown to compensate, at least partly, for their lower cold resistance.  
346 Although house mice, upon starvation, are capable of daily torpor<sup>47</sup>, they can be considered  
347 as non-hibernators in a classical sense. Correspondingly, we observed that treating murine

348 neurons with either BAM15 or PI (drugs previously used by Ou et al.) increased their cold  
349 survival (Fig. 6A). Assuming that, like for nematodes, iron management is crucial for the  
350 survival of cold-treated neurons, we treated neurons with the iron-chelating drug  
351 deferoxamine, DFO (expected to lower cellular levels of free iron). Indeed, DFO treatment  
352 protected neurons from cold-related death to the same extent as BAM15, PI, or drug  
353 combinations (Fig. 6A).

354 In contrast to hibernating neurons, the non-hibernating neurons display a striking  
355 deterioration of neuronal processes/neurites, which is counteracted by BAM15 and/or PI  
356 treatment<sup>46</sup>. By staining neurons against NEFH (neurofilament protein heavy polypeptide; a  
357 neuron-specific component of intermediate filaments), we observed that also DFO had a  
358 strong stabilizing effect on cold-treated neurites (Fig. 6B-C). This protection appeared to be  
359 long-lasting, as the neurites were still evident at 24 h into rewarming (Fig. S6B-C).

360

### 361 **Overproduction of FTH1 improves cold survival of mammalian neurons**

362 By lowering the pool of free iron, DFO could, indirectly, reduce the levels of Fe(II).  
363 Nonetheless, to monitor ferrous iron directly, we employed a fluorescent probe, FeRhoNox-  
364 1, which specifically detects Fe(II). Strikingly, we observed a strong, though transient,  
365 increase of Fe(II) during rewarming (Fig. S7A-B), which was prevented by DFO treatment  
366 (Fig. 7A). Since ferrous iron catalyzes the formation of reactive oxygen species (ROS), we  
367 also measured ROS levels, using CellROX-green. We observed a strong increase of ROS  
368 during rewarming, at the time coinciding with the Fe(II) peak. Importantly, that increase was  
369 counteracted by DFO treatment, as expected (Fig. 7B).

370 If, as expected, decreasing ROS is important for the recovery from cold, treating  
371 neurons with antioxidants should provide similar benefit as DFO. To test that, we selected  
372 three therapeutic antioxidants: Edaravone<sup>48-50</sup>, N-acetylcysteine, NAC<sup>51-53</sup>, and TEMPOL<sup>54</sup>.  
373<sup>55</sup>. Indeed, treating neurons with these drugs strongly enhanced cold survival (Fig. 7C).

374 Finally, we decided to test whether, similar to *ftn-1* overexpression in nematodes,  
375 overexpression of its mammalian counterpart, *Fth1*, improves cold survival of neurons.  
376 Indeed, we found that *Fth1*-overexpressing neurons survived cold significantly better than  
377 mock-transfected neurons (Fig. 7D).

378 Summarizing, cultured neurons appear to respond to hypothermia in a manner  
379 remarkably reminiscent of nematodes. Although Fe(II) was only imaged in neurons, both  
380 nematodes and neurons display a transient increase in ROS during rewarming. Moreover,  
381 induction of FTN-1/FTH1 enhances cold survival in both models. Presumably, this reflects  
382 the capacity of both orthologous proteins for iron detoxification and, consequently, for  
383 reducing ROS. Importantly, targeting the free iron-Fe(II)-ROS axis with drugs enhances  
384 neuronal cold resistance, suggesting that these and related drugs might prove beneficial in  
385 treating hypothermia.

386

387



## 388 **DISCUSSION**

389 Using a simple, genetically tractable animal model for cold preservation, we uncovered a  
390 conserved ability of ferritin to promote cold survival. In this context, FTN-1/FTH1 (ferritin  
391 heavy chain) appears to function as an endogenous antioxidant, which counteracts iron-  
392 mediated cytotoxicity arising during the recovery from cold. Intriguingly, the elevated  
393 expression of *FTH1* has been recognized as a distinctive feature of cold adaptation in  
394 hibernating primates, during both daily torpor and seasonal hibernation<sup>56, 57</sup>. Thus, a  
395 mechanism that we turned on artificially in nematodes, through genetic manipulation, may  
396 be used actually by some hibernators as a cell-intrinsic mechanism boosting cold resistance.  
397 What causes in those animals *FTH1* upregulation remains unknown. However, FoxO3a  
398 (related to DAF-16 described here) is upregulated in hibernating squirrels<sup>58</sup>, arguing for a  
399 conserved function of FoxO transcription factors in cold resistance, which might involve the  
400 induction of ferritin.

401 How exactly, and why, cold triggers the accumulation of toxic iron remains to be  
402 fully understood. In mammalian epithelial cells, a sizeable fraction of cold-induced free iron  
403 was proposed to originate from the microsomal cytochrome P-450 enzymes, which require  
404 iron-containing heme as a cofactor<sup>59</sup>. It was also suggested that the cytosolic free iron  
405 causes mitochondrial permeabilization, resulting in apoptosis<sup>60</sup>. However, as also shown  
406 here, treating neurons with BAM15, a mitochondrial uncoupler, suppresses both ROS and  
407 cold-induced death<sup>46</sup>. Assuming that the same treatment reduces iron(II) levels, it may  
408 instead suggest the mitochondrial origin of iron toxicity, which agrees with the general view  
409 that most cellular ROS is of mitochondrial origin<sup>61</sup>. Irrespective of its sources, once  
410 accumulating, iron(II) can catalyze the formation of ROS, damaging diverse cellular  
411 components (like lipids, proteins and nucleic acids), and causing a number of acute and  
412 chronic degenerative conditions<sup>62, 63</sup>.

413           Crucially, the antioxidant defense is a hallmark of hibernation, being particularly  
414 critical during the entry to and exit from hibernation, when oxygen-sensitive tissues, like the  
415 brain, are particularly vulnerable to ischemia/reperfusion injury <sup>4</sup>. Thus, the challenges  
416 associated with cooling appear to be, to some extent, similar to those facing the brain in  
417 other pathologies. Indeed, the antioxidants employed here have been used to improve  
418 outcomes of acute ischemic stroke (Edaravone), hypoxic-ischemic encephalopathy (NAC),  
419 and iron-induced cerebral ischemic injury (TEMPOL). Therefore, activating mechanisms  
420 protecting cells from cold, or mimicking their effects with drugs, could benefit not only  
421 hypothermia patients, but be potentially useful in treating other pathologies, like stroke or  
422 neurodegenerative disorders.

423

424 **ACKNOWLEDGMENTS**

425 We are grateful to Susan Gasser and the Gasser lab for supporting TP in later stages of her  
426 PhD. We thank S. Smallwood and S. Thiry for assistance with mRNA sequencing, L.  
427 Gelman and S. Bourke for imaging support, and W. Wendlandt-Stanek for FTN-1 modeling.  
428 We thank Collin Ewald, Jacek Kolanowski, Gawain McColl, and Göran Nilsson for  
429 discussions and comments on the manuscript. The project POIR.04.04.00-00-203A/16 was  
430 carried out within the Team program of the Foundation for Polish Science, co-financed by  
431 the European Union under the European Regional Development Fund. RC was also  
432 supported by the EMBO Installation Grant No. 3615, the Polish National Science Centre  
433 grant 2019/34/A/NZ3/00223, and the Research Council of Norway grant FRIMEDBIO-  
434 286499. KS-K and MFi were supported by the National Science Centre grant  
435 2018/31/B/NZ3/03621. Some of the strains were provided by the Caenorhabditis Genetics  
436 Center (CGC) funded by the NIH. The Nestin antibody was obtained from the  
437 Developmental Studies Hybridoma Bank, created by the NICHD of the NIH, and maintained  
438 at the University of Iowa.

439

440 **AUTHOR CONTRIBUTIONS**

441 TP performed and analyzed most nematode experiments in Figs. 1-3. JL and KŚ-K  
442 performed and analyzed experiments in Figs. 6-7, under the guidance of MFi, who also  
443 provided the neuronal stem cell-sphere model. AK and DS performed and analyzed  
444 nematode experiments shown in Figs. 4-5; MFr oversaw the ICP-MS experiments. YG  
445 analyzed the genomic data, and performed some nematode experiments. RC conceived and  
446 supervised the project. RC with other authors wrote the manuscript.

447

448 **DECLARATION OF INTERESTS**

449 The authors declare no competing interests.

450 **FIGURE LEGENDS**

Pecek et al., Figure 1

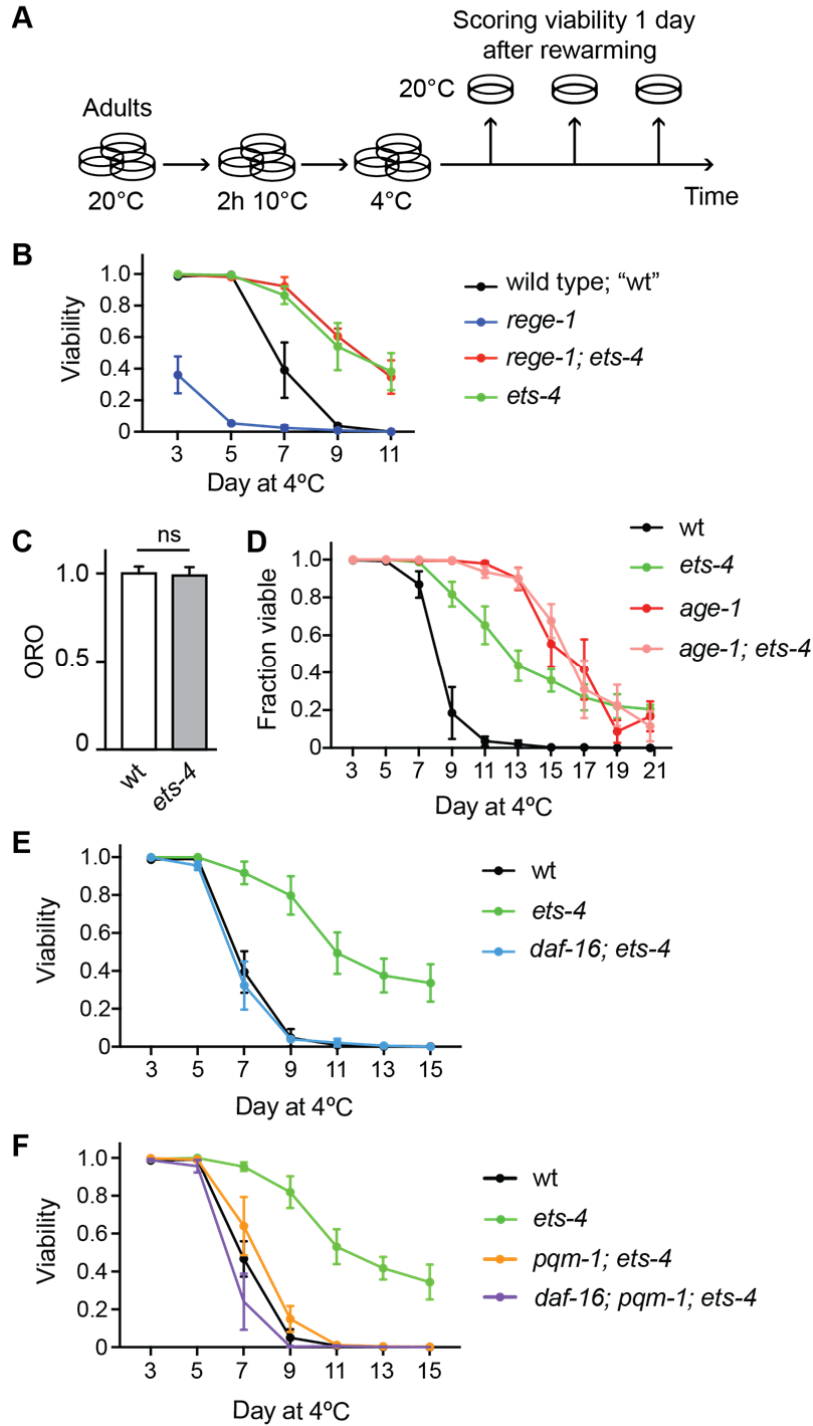

451

452

453 **Figure 1. Enhanced cold survival of *ets-4* (-) mutants depends on DAF-16 and PQM-1**

454 **A.** Graphical view of a typical cold-survival experiment, described in detail in the Methods.  
455 Shortly, 1 day-old adults, pre-grown at 20°C and distributed between multiple plates, were  
456 cold-adapted (for 2 hours at 10°C) and then shifted to 4°C. Every few days, a plate was  
457 transferred to 20°C and, after 1 day of recovery at 20°C, the animals were scored for  
458 viability.

459 **B.** Cold survival of animals of the indicated genotypes. Mutant alleles throughout the paper  
460 are indicated in parentheses and, unless specified otherwise, are loss-of-function alleles.  
461 Note that *ets-4(rrr16)* mutants, like *rege-1(rrr13); ets-4(rrr16)* double mutants, survived cold  
462 better than wild type (wt). The experiment was performed three times (n= 3); 200-350  
463 animals were scored per time point. Error bars represent standard error of the mean (SEM).

464 **C.** Quantification of body fat, stained with the lipophilic dye oil red O (ORO), in animals of the  
465 indicated genotypes. The levels of body fat were similar between wt and *ets-4(rrr16)*  
466 mutants. n= 3; 10-15 animals were scored per replicate. Error bars represent SEM. Unpaired  
467 two-tailed t-test was used to calculate the p value, “ns” = not significant.

468 **D.** Cold survival of animals of the indicated genotypes (D-F; error bars represent SEM). The  
469 *age-1(hx546)* mutants displayed greatly enhanced cold resistance, and combining *age-*  
470 *1(hx546)* and *ets-4(rrr16)* mutations did not provide animals with additional resistance. n= 4;  
471 350-500 animals were scored per time point.

472 **E.** Combining *daf-16(mu86)* and *ets-4(rrr16)* mutations abolished the enhanced cold survival  
473 of *ets-4(-)* mutants, reverting it to wild-type values. n= 4; 350-500 animals were scored per  
474 time point.

475 **F.** Combining *pqm-1(ok485)* and *ets-4(rrr16)* mutations abolished the enhanced cold survival  
476 of *ets-4(-)* mutants, reverting it to wild-type values. Also note that the triple *daf-16(mu86);*  
477 *pqm-1(ok485); ets-4(rrr16)* mutants survived cold essentially like wild type, indicating that

478 DAF-16 and PQM-1 promote cold survival in *ets-4(-)*, but not wild-type animals. n= 4; 450-  
479 650 animals were scored per time point.

Pekec et al. Figure 2

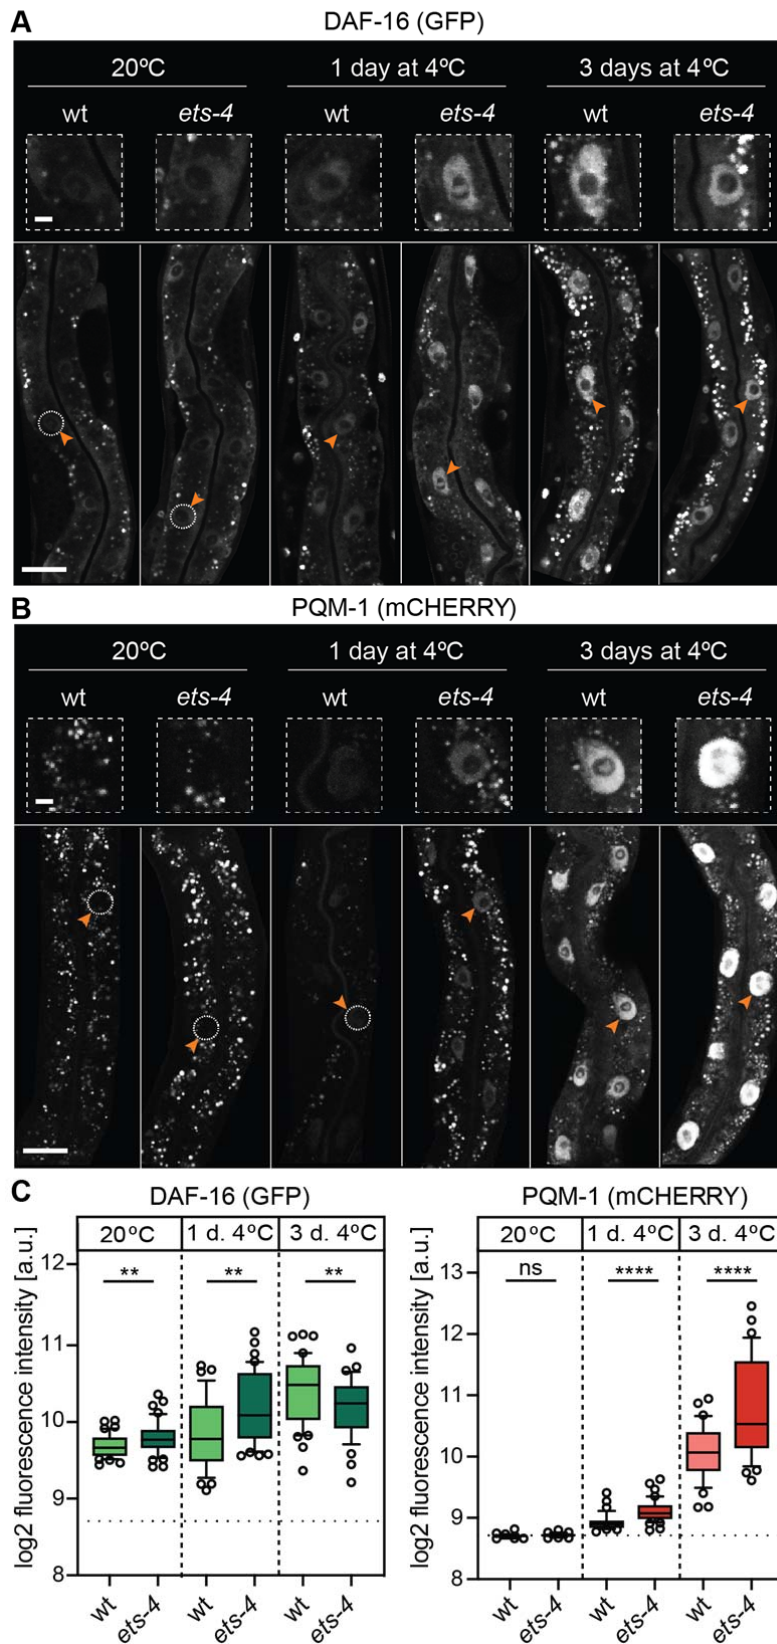

481 **Figure 2. DAF-16 and PQM-1 are enriched in the nuclei in the cold**

482 **A.** Micrographs showing representative confocal images of GFP fluorescence, reflecting the  
483 endogenously tagged DAF-16, allele *daf-16(syb707)*, from wt or *ets-4(rrr16)* mutants. The  
484 animals were sampled at the indicated times and temperatures, according to 1A. The  
485 corresponding quantifications are in C. Arrowheads point to representative gut nuclei  
486 (demarcated with dashed circles when displaying little or no fluorescence), which are  
487 enlarged in the insets above. Size bars, here and in B: 5  $\mu\text{m}$  (small magnification) and 25  
488  $\mu\text{m}$  (large magnification).

489 **B.** Representative confocal images of mCherry fluorescence, reflecting the endogenously  
490 tagged PQM-1, allele *pqm-1(syb432)*, from wt or *ets-4(rrr16)* mutants. The animals were  
491 sampled as above. The corresponding quantifications are in C. Arrowheads point to  
492 representative gut nuclei, enlarged in the insets above.

493 **C.** Quantifications of the nuclear fluorescence, corresponding to A (left) and B (right). Each  
494 data point represents  $\log_2$ -transformed mean nuclear intensity per animal. Dotted line  
495 represents the average background within each experiment. Left:  $n = 3$ ; 10 to 15 animals  
496 were scored per replicate. Error bars represent 10<sup>th</sup> to 90<sup>th</sup> percentile. Unpaired two-tailed t-  
497 test was used to calculate the p value. \*\* indicates  $p < 0.01$ . Right:  $n = 3$ ; 10 to 15 animals  
498 were scored per replicate. “ns” = not significant; \*\*\*\* indicates  $p < 0.0001$ .

499



Pekec et al. Figure 3

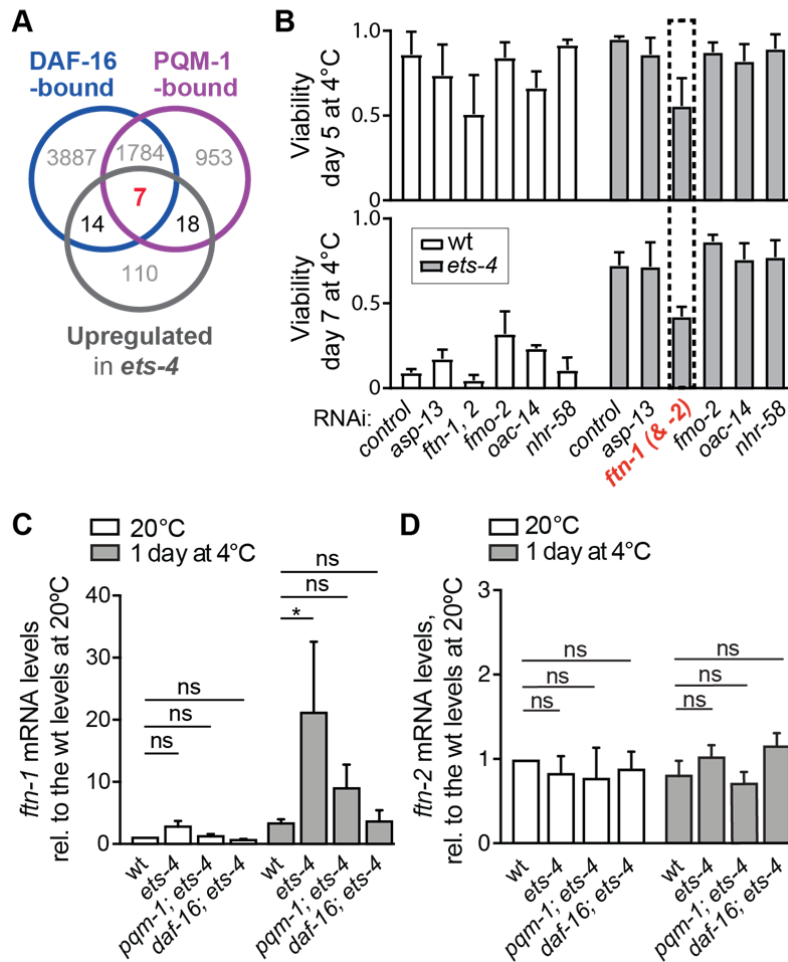

500

501 **Figure 3. DAF-16 and PQM-1 coregulate expression of *ftn-1*/ferritin**

502 **A.** Diagram comparing relations between three sets of genes: Grey circle: genes  
 503 upregulated more than 2-fold in *ets-4(rrr16)* mutants compared to wt (at day 1 at 4°C and in  
 504 two replicates, see Fig. S3A). Blue circle: genes whose promoters are bound by DAF-16  
 505 (according to Tepper et al.). Magenta: genes whose promoters are bound by PQM-1  
 506 (according to Tepper et al.). Note that seven genes (*asp-13*, *cpt-4*, *fmo-2*, *ftn-1*, *nhr-58*, *oac-*  
 507 *14*, and *pals-37*), whose promoters are bound (at normal temperature) by both DAF-16 and  
 508 PQM-1, were reproductively upregulated in the absence of ETS-4.

509 **B.** The candidates from A were RNAi-depleted, from either wt or *ets-4(rrr16)* animals, and  
510 those animals were tested for cold resistance (according to 1A) at the indicated times. Note  
511 that depleting *ftn-1* (and *ftn-2*, as RNAi is predicted to target both homologs) significantly  
512 reduced cold survival of *ets-4(rrr16)* animals (stippled box). Error bars represent SEM. n= 3;  
513 200-350 animals were scored per time point.

514 **C.** Shown are *ftn-1* mRNA levels, measured by RT-qPCR, in animals of the indicated  
515 genotypes. Strains used: wt, *ets-4(rrr16)*, *pqm-1(ok485); ets-4(rrr16)*, and *daf-16(mu86); ets-*  
516 *4(rrr16)*. The animals were sampled at 20°C, before cold adaptation, and after one day at  
517 4°C, according to 1A. The mRNA levels were normalized to the levels of *act-1* (actin) mRNA.  
518 At each temperature, the values were then normalized to those from the wild type at 20°C.  
519 n= 5; error bars represent SEM. P values were calculated using 2-way ANOVA for multiple  
520 comparisons. “ns” = not significant; \* indicates p > 0.05.

521 **D.** The animals were collected as in C. The levels of *ftn-2* mRNA, measured by RT-qPCR,  
522 were normalized to *act-1* mRNA, and are shown relative to the *ftn-2* mRNA level in wt at  
523 20°C. Wt and *ets-4(-)* animals were collected at 20°C and after one day at 4°C (n= 3). P  
524 values were calculated using 2- way ANOVA. Error bars represent SEM. “ns” = not  
525 significant.

526

Pekec et al. Figure 4

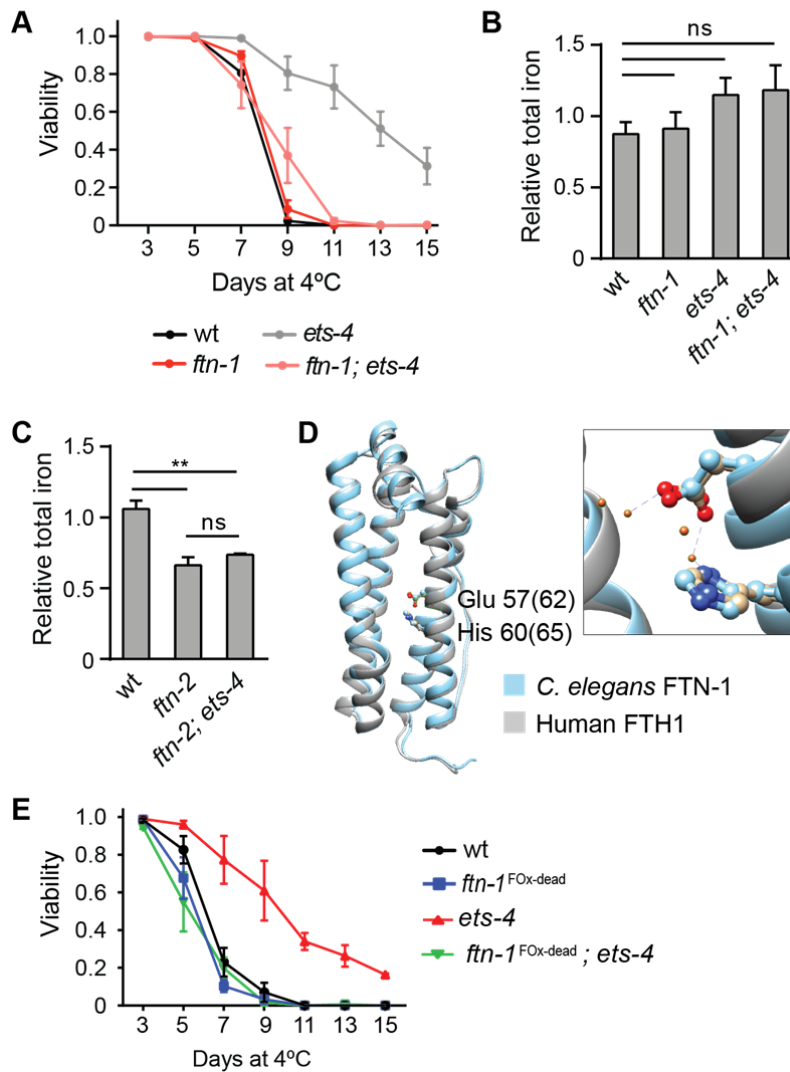

527

528 **Figure 4. FTN-1 promotes cold survival via its ferroxidase activity**

529 **A.** Viability of animals, of the indicated genotypes, subjected to cold as explained in 1A.  
 530 Error bars represent SEM. n= 3; 250-400 animals were scored per time point. Note that  
 531 combining the *ftn-1(ok3625)* mutation with *ets-4(rrr16)* reverted the enhanced cold survival  
 532 of *ets-4(-)* mutants to wild-type values, similar to the double *daf-16(-); ets-4(-)* or *pqm-1(-);*  
 533 *ets-4(-)* mutants in 1E-F. Also, like *daf-16(-)* and *pqm-1(-)* single mutants in S1E, *ftn-*  
 534 *1(ok3625)* single mutants survived cold as well as wt.

535 **B.** Total iron levels in *C. elegans* extracts, measured by ICP-MS. Wild type, *ets-4(rrr16)*, *ftn-*  
536 *1(ok3625)*, and *ftn-1(ok3625); ets-4(rrr16)*, 1 day-old adults were subjected to cold for 3  
537 days. The values were normalized to those of the wild type. Unpaired two-tailed t-test was  
538 used to calculate the p value, “ns” = not significant. Error bars represent SEM, n= 3. Note  
539 that inactivating FTN-1 had no impact on the total iron levels.

540 **C.** Comparing total iron levels, measured by ICP-MS, in *C. elegans* extracts derived from  
541 wild-type, *ftn-2(ok404)*, and *ftn-2(ok404); ets-4(rrr16)*, 1 day-old adults, subjected to cold for  
542 3 days. The values were normalized to those of the wild type. Unpaired two-tailed t-test was  
543 used to calculate the p value, “ns” = not significant, \*\* p value < 0.01. Error bars represent  
544 SEM, n= 3. Note that inactivating FTN-2 decreased the levels of total iron, also in *ets-4(-)*  
545 animals.

546 **D.** Structural alignment of *H. sapiens* ferritin heavy chain 1 (FTH1 – colored in grey, PDB  
547 code 4OYN) and *C. elegans* FTN-1 (colored in light blue), using the Phyre2 tool <sup>64</sup>. Amino  
548 acids critical for the ferroxidase activity are shown as balls and sticks. The colors indicate:  
549 carbon atoms in FTH1 (light brown) or FTN-1 (light blue), oxygen atom of glutamic acid  
550 (red), and nitrogen atom of histidine (dark blue). The magnification shows the ferroxidase  
551 active site, with the iron atoms shown as dark orange balls and coordination bonds as dotted  
552 lines.

553 **E.** Cold survival of animals of the indicated genotypes subjected to cold, as in 1A. “*ftn-1*<sup>FOx-</sup>  
554 <sup>dead</sup>” indicates the *ftn-1(syb2550)* allele, which encodes FTN-1 variant with point mutations  
555 (E57K and H60G, where the first methionine is counted as 0) abolishing its ferroxidase  
556 activity. Note that combining *ets-4(rrr16)* and *ftn-1(syb2550)* mutations completely abolished  
557 the enhanced cold resistance of *ets-4(-)* single mutant. Error bars represent SEM. n= 3; 261-  
558 396 animals were scored per time point.

Pekec et al. Figure 5

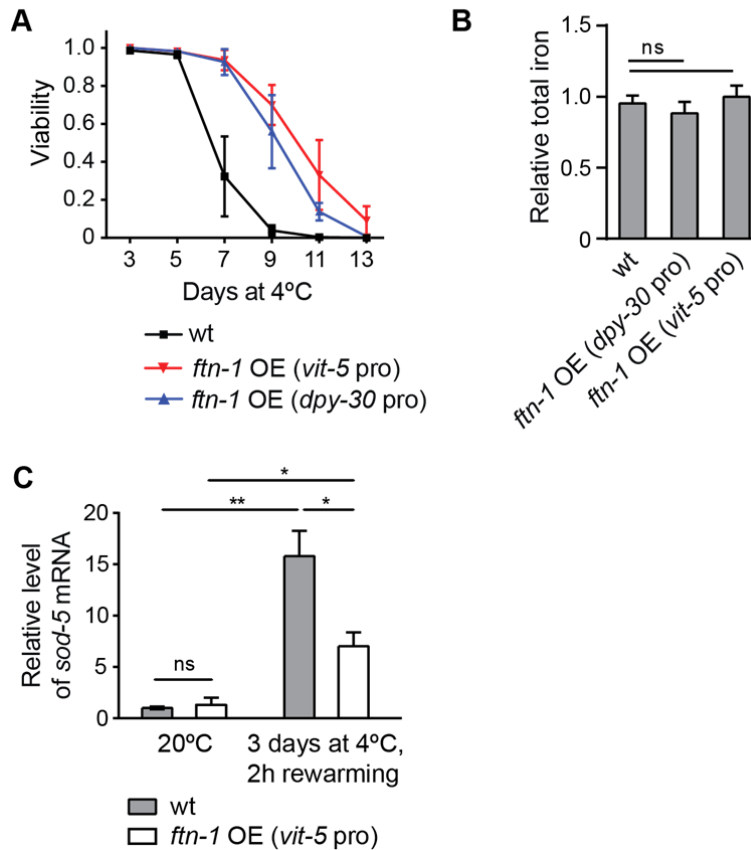

559

560

561 **Figure 5. FTN-1 overexpression is sufficient for enhanced cold survival**

562 **A.** Survival of animals of the indicated genotypes subjected to cold, as in 1A. The *ftn-1*  
563 overexpressing lines (*sybSi67* and *sybSi72*) are marked as *ftn-1* OE (*dpy-30* pro) and *ftn-1*  
564 OE (*vit-5* pro), respectively. Note that both *ftn-1*-overexpressing strains survived cold better  
565 than wt; *ftn-1* overexpression from the *vit-5* promoter was slightly more beneficial, which is  
566 why we chose this strain for additional experiments. Error bars represent SEM, n= 3. 232-  
567 307 animals were scored per time point.

568 **B.** Total iron levels, measured by ICP-MS, in *C. elegans* extracts derived from wild type, or  
569 *ftn-1* overexpressing, 1 day-old adults, grown at 20°C. The values were normalized to wild

570 type. Unpaired two-tailed t-test was used to calculate the p value, “ns” = not significant. Error  
571 bars indicate SEM, n= 3.

572 **C.** Relative levels of *sod-5* mRNA, measured (by RT-qPCR) in animals of the indicated  
573 genotypes, and at the time and temperature. Note that the cold-treated animals were  
574 analyzed at around 2 hours into rewarming at 20°C. mRNA levels were normalized to *act-1*  
575 mRNA. At each time point, the values were then normalized to the wt at 20°C. Error bars  
576 represent SEM. n= 3; p values were calculated using an unpaired Student t-test. \* indicates  
577  $p < 0.05$ ; \*\*  $p < 0.01$ ; “ns” = not significant.

578

Pekec et al. Fig. 6

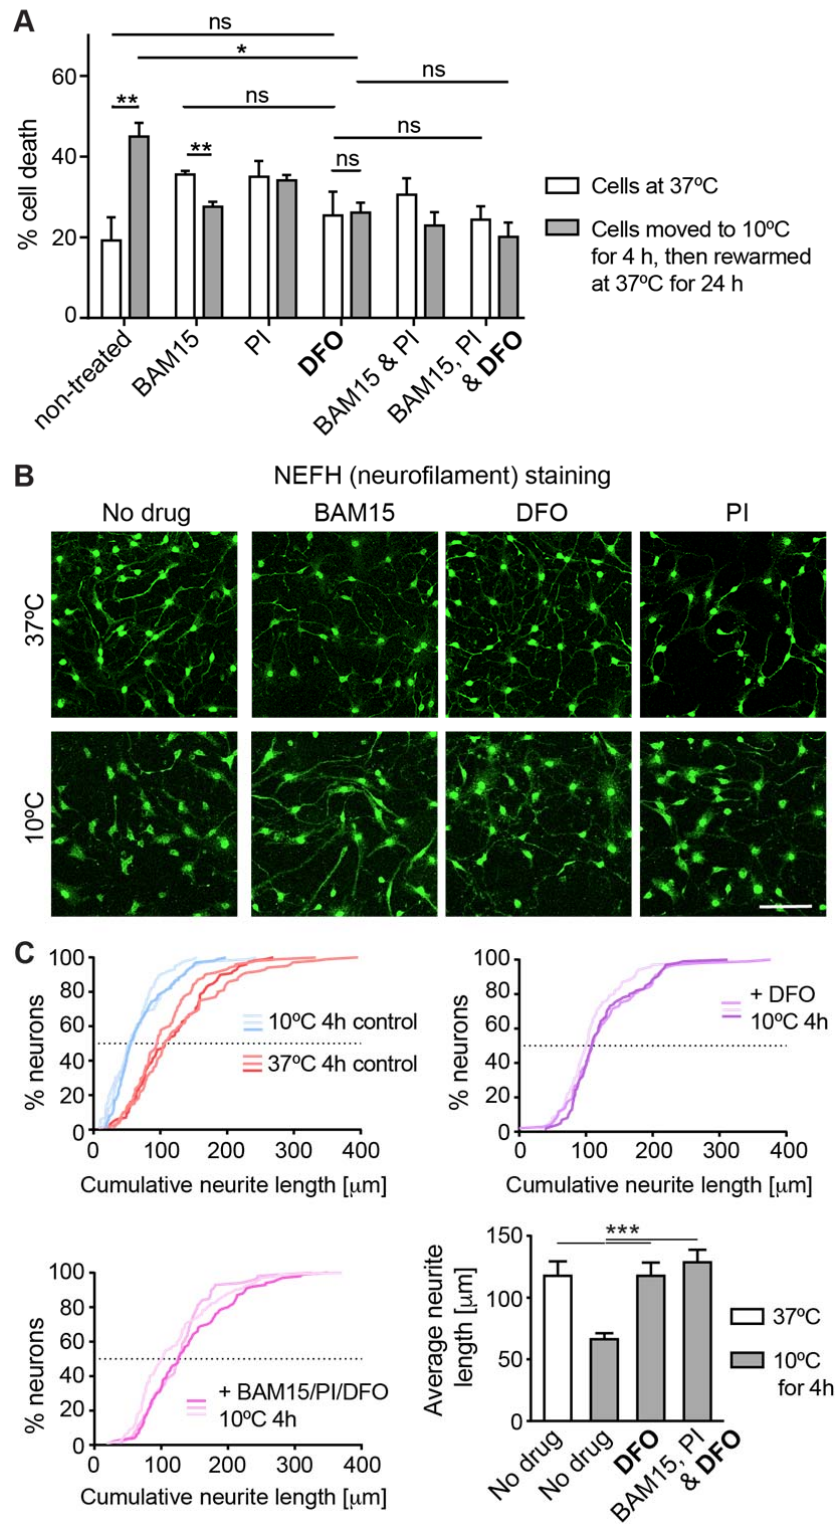

579

580 **Figure 6. Reducing free iron protects murine neurons from cold-induced degeneration**

581 **A.** Viability of murine neurons, subjected to cold and the indicated drugs, was examined by  
582 staining with propidium iodide (see Methods for details). “BAM15” is a mitochondrial  
583 uncoupling drug, “PI” a cocktail of protease inhibitors, and “DFO” deferoxamine, an iron  
584 chelator. Error bars represent SEM.  $n = 3$  experiments;  $p$  values, between cold-treated and  
585 control (37°C) samples, were calculated with Student's  $t$ -test, while the ANOVA plus Tukey  
586 post hoc test was used to compare samples subjected to different drugs. \* indicates  $p <$   
587 0.05; \*\*  $p < 0.01$ ; and “ns” not significant. Note that, in contrast to non-treated cells incubated  
588 at 10°C, treating cells with DFO prevented cell death to a similar extent as the treatment with  
589 BAM15, PI, or the combination of drugs.

590 **B.** Representative confocal images of murine neurons, subjected to cold and the indicated  
591 drugs, and immunostained for NEFH to visualize neurites immediately after cold treatment.  
592 Scale bar: 40  $\mu\text{m}$ . Note that the neurites, which in control neurons degenerated upon cold  
593 exposure (the bottom left panel), were stabilized by adding DFO, similar to BAM15 or PI.

594 **C.** Quantifications of neurite lengths, visualized by NEFH labeling, corresponding to B. The  
595 cumulative plots (see Methods) compared neurite lengths in cells treated as indicated. Each  
596 curve corresponds to one experimental replicate. The bar graph (bottom right) compares  
597 average neurite lengths. While cold treatment led to the shortening of neurites, treating cells  
598 with DFO alone stabilized the neurites equally well, as when combined with BAM15 and PI.  
599 Error bars represent SD. \*\*\* indicates  $p < 0.001$ .

600



Pekec et al. Fig. 7

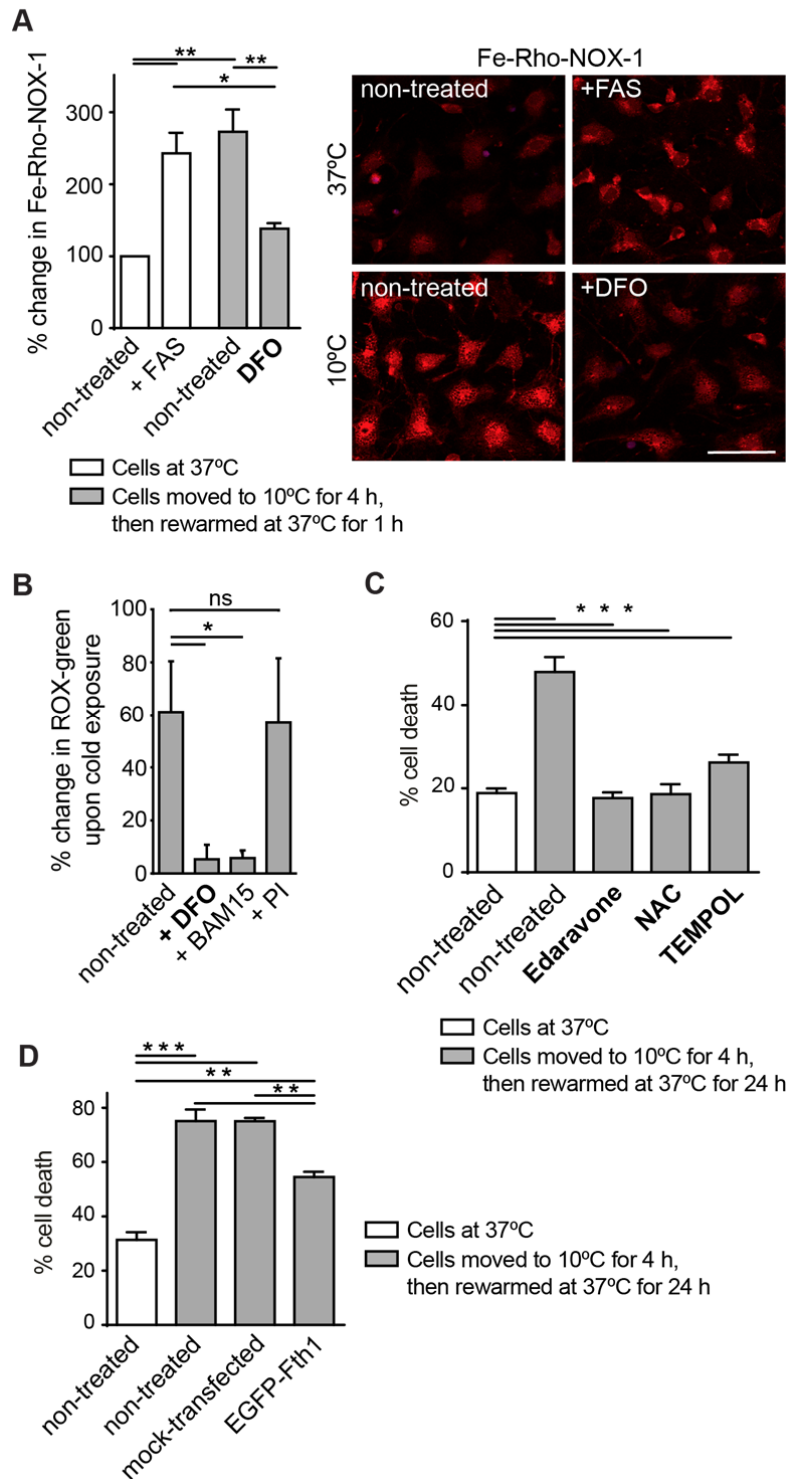

601

602 **Figure 7. Lowering iron(II) or ROS, or FTH1 overexpression, all enhance neuronal cold**

603 **resistance**

604 **A.** Examining iron(II) levels, using the fluorescent FeRhoNox-1 probe (see Methods), in  
605 neurons subjected to cold and/or the indicated drugs. Left: quantifications of FeRhoNox-1  
606 fluorescence, relative to non-treated cells incubated at 37°C. "FAS" indicates ammonium  
607 ferrous sulfate, here a source of additional iron(II). n= 3; p values were calculated by ANOVA  
608 plus post hoc Tukey test. \*\* indicates  $p < 0.01$ ; and \*  $p < 0.05$ . Error bars represent SEM.  
609 Representative images are on the right. Scale bar: 50  $\mu\text{m}$ . Note that the exposure to cold  
610 resulted in higher levels of reactive iron, and that this accumulation was prevented by DFO  
611 treatment.

612 **B.** Comparing ROS levels, using the CellROX-green sensor (see Methods), in neurons  
613 subjected to cold and the indicated drugs, relative to non-treated cells incubated at 37°C. n=  
614 3 experiments; p values were calculated by ANOVA plus post hoc Tukey test. \* indicates  $p <$   
615 0.05; and "ns" not significant. Drugs were administered immediately before transferring cells  
616 to cold. Error bars indicate SEM.

617 **C.** Viability of murine neurons, subjected to cold and the indicated antioxidants, examined by  
618 staining with propidium iodide. "Edaravone" acts against oxygen and hydroxyl radicals, and  
619 inhibits lipid peroxidation/lipoxygenase pathways; "NAC", N-Acetyl-Cysteine, a glutathione  
620 precursor; "TEMPOL" possesses superoxide dismutase (SOD) and catalase (CAT) mimetic  
621 properties. Error bars represent SEM. n= 3 experiments; p values between samples were  
622 calculated with ANOVA plus Tukey post hoc test was used to compare samples subjected to  
623 different drugs. \*\*\* indicates  $p < 0.001$ . Note that all tested antioxidants enhance cold  
624 resistance.

625 **D.** Viability of murine neurons overexpressing Fth1/ferritin heavy chain. Following lentiviral  
626 incorporation of EGFP-fused *Fth1*, and a 4 hour incubation in the cold, the survival of  
627 transfected neurons was compared to controls; the "mock" neurons were transfected with an  
628 "empty" pLJM1-EGFP plasmid. Error bars represent SEM. n= 3 experiments; p values  
629 between samples were calculated with ANOVA plus Tukey post hoc test was used to

630 compare samples subjected to different drugs. \*\*\* indicates  $p < 0.001$ ; and \*\*  $p < 0.01$ . Note

631 that neurons overexpressing EGFP-Fth1 survive cold better than control neurons.

632

633 **METHODS**

634

635 ***C. elegans* handling and genetic manipulation**

636 Animals were grown at 20°C on standard NGM plates, fed with the OP50 *E. coli* bacteria<sup>65</sup>.  
637 All strains used in this study are listed in Table S1. The CRISPR/Cas9 genome editing was  
638 used by SunyBiotech to generate the *ftn-1* ferroxidase-dead mutant (allele *syb2550*), and to  
639 tag *daf-16* and *pqm-1* (alleles *syb707* and *syb432*, respectively). The latter was achieved  
640 through the C-terminal, in-frame insertion of GFP-FLAG (*daf-16*) or mCHERRY-MYC (*pqm-*  
641 *1*). The FTN-1 overexpressing strains (alleles *sybSi67* and *sybSi72*) were generated (by  
642 SunyBiotech) using the MosSCI method, utilizing the insertion locus ttTi5605. The *ftn-1* OE  
643 constructs were generated using the MultiSite Gateway Technology, and contain circa 2 kb  
644 of *dpy-30*, or 1.4 kb of *vit-5* promoter, the genomic *ftn-1* DNA, and 0.7 kb of the *unc-54*  
645 3'UTR. The *sod-5::GFP* strain, GA411, was kindly provided by David Gems.

646 For RNAi experiments, 1 mM IPTG was added to an overnight culture of RNAi  
647 bacteria. 300 µl of bacterial suspension was plated onto agar plates containing 100 µl/ml  
648 Carbenicillin and 1 mM IPTG. The L4440 (empty) vector was used as a negative RNAi  
649 control. Animals were typically placed on RNAi plates as L1 larvae, and then were grown to  
650 day 1 adulthood at 20°C, at which time point they were cold-adapted and scored as  
651 described. The RNAi clones used in this study came from either Ahringer or Vidal libraries.

652

653 **The assay for *C. elegans* cold survival**

654 Unless stated otherwise, all cold survival experiments were performed in the following way:  
655 prior to cold adaptation, animals were grown at 20°C for two generations on OP50. They  
656 were then synchronized by bleaching, and L1 larvae were grown until day 1 of adulthood at  
657 20°C. At day 1 of adulthood, they were cold-adapted at 10°C for 2 h, and then shifted to 4°C.

658 Animals were sampled at indicated intervals, and their survival was scored after 24 h  
659 recovery at 20°C. Pairwise Wilcoxon signed rank test, in R, was used  
660 for statistical comparisons of survival curves between strains. Original counting data and  
661 statistical results are included in Table S2.

662 To examine the sensitivity to ferric ammonium citrate (FAC), animals were grown at  
663 20°C, from L1s to day 1 of adulthood, on different concentrations of FAC, which was added  
664 to agar in plates. Animals were then cold-treated and scored for survival as above.

665

### 666 **Poly-A mRNA sequencing**

667 1000 day one adult animals were collected 24 h after cold adaptation. All steps up to Trizol  
668 collection were performed at 4°C. Animals were washed 2 times in M9 buffer and snap-  
669 frozen in Trizol. Samples were then lysed by freeze/thaw cycles, and RNA extraction  
670 proceeded as described before<sup>66</sup>. Genomic DNA was removed using RNeasy Plus Mini Kit  
671 (Qiagen). Quality of RNA was monitored by Bioanalyzer RNA Nano chip (Agilent  
672 Technologies). The library was prepared using the TruSeq Library Preparation Kit (Illumina).  
673 Poly-A mRNA was sequenced using a Hiseq 50-cycle single-end reads protocol on a HiSeq  
674 2500 device (Illumina). Raw RNA sequence data were deposited at GEO with accession No.  
675 GSE131870.

676

677

### 678 **Genomic data analysis**

679 FASTQC<sup>67</sup> was used to check the quality of the raw sequence data. The reads were  
680 mapped to the *C. elegans* genome (Ensembl WBcel235) using STAR<sup>68</sup>, with default  
681 parameters except: `outFilterMismatchNmax 3,outFilterMultimapNmax 1, alignIntronMax`  
682 `15000, outFilterScoreMinOverLread 0.33, outFilterMatchNminOverLread 0.33. Count`

683 matrices were generated for the number of reads overlapping with the exons of protein-  
684 coding genes using summarizeOverlaps from GenomicFeatures<sup>69</sup>. Gene expression levels  
685 (exonic) from RNA-seq data were quantified as described previously<sup>70</sup>. After normalization  
686 for library size, log2 expression levels were calculated after adding a pseudocount of 8 ( $y =$   
687  $\log_2[x + 8]$ ). Genes with 2-fold changes in both replicates were considered significantly  
688 differentially expressed. The ChIP bigWig files for PQM-1 and DAF-16 was obtained from  
689 ENCODE project<sup>30</sup>. EnrichedHeatmap<sup>71</sup> was used to generate the integrative heatmap.

690

### 691 **RT-qPCR**

692 Around 1000, 1 day-old adult *C. elegans* were collected at 20°C prior to cold adaptation, or  
693 at 1 day/ 3 days at 4°C after adaptation, washed 2 times in M9 buffer at the respective  
694 temperature, and flash-frozen in Trizol. RNA was isolated as above. 300 ng, or 1000 ng of  
695 RNA was used to prepare cDNA with the QuantiTect Reverse Transcription kit (Quiagen), or  
696 High-Capacity cDNA Reverse Transcription Kit (Applied Biosystems). cDNA was diluted  
697 1:10 or 1:5 and 5 µl or 2 µl was used with the Light Cycler Syber Green master mix (Roche),  
698 or AMPLIFY ME SG Universal Mix (Blirt), and Ct values were calculated using Light Cycler  
699 480 (Roche). *act-1* (actin) was used as the reference gene. Statistical analysis on all of the  
700 experiments was performed using the GraphPad/ Prism 8. Statistical method used to  
701 calculate P value is indicated in the figure legend. The following primers were used: *act-1*  
702 FW: CTATGTTCCAGCCATCCTTCTTGG, *act-1* RV: TGATCTTGATCTTCATGGTTGATGG;  
703 *ets-4* FW: CTGAGAACCCGAATCATCCA, *ets-4* RV: TCATTCATGTCTTGACTGCTCC; *ftn-1*  
704 FW: CGGCCGTCAATAAACAGATTAACG, *ftn-1* RV: CACGCTCCTCATCCGATTGC; *daf-16*  
705 FW: AAAGAGCTCGTGGTGGGTTA, *daf-16* RV: TTCGAGTTGAGCTTTGTAGTCG; *pqm-1*  
706 FW: GTGCATCCACAGTAAACCTAATG, *pqm-1* RV: ATTGCAGGGTTCAGATGGAG; *ftn-2*  
707 FW: GAGCAGGTCAAATCTATCAACG, *ftn-2* RV: TCGAAGACGTACTCTCCAACCTC; *sod-5*  
708 FW: ATTGCCAATGCCGTTCTTCC, *sod-5* RV: AGCCAAACAGTTCCGAAGAC.

709

### 710 **Fluorescent imaging of *C. elegans* intestinal nuclei**

711 1 day-old *C. elegans* were anesthetized in 20  $\mu$ M levamisol and placed on 2 % agar pads.  
712 DAF-16::GFP::FLAG and PQM-1::mCHERRY::MYC were imaged on a spinning disc  
713 confocal microscope: Zeiss AxioImager equipped with a Yokogawa CSU-W1 scan-head, 2  
714 PCO Edge cameras, a Plan-Apochromat 40x/1.3 oil objective and two 488 nm and 561 nm  
715 laser lines. Laser intensities and exposure times were kept constant for all samples, camera  
716 binning was set to 2. Mean fluorescence intensity in intestinal cell nuclei (three per  
717 nematode) was quantified manually with FIJI/ImageJ<sup>72</sup>. The mean fluorescence intensities  
718 of each nucleus were averaged and represent one data point for each animal. 10-15 animals  
719 were scored per genotype and biological replicate, in total around 40 animals per condition.  
720 Statistical analysis was performed using the GraphPad/ Prism 8. Two-tailed, unpaired, t-test  
721 was performed to calculate the p value between conditions.

722

### 723 **Fluorescent imaging of SOD-5::GFP**

724 1 day-old adults were anesthetized in 10 mM levamisol and placed on 2 % agar pads. The  
725 GFP fluorescence was imaged on Axio Imager.Z2 (Carl Zeiss), equipped with AxioCam 506  
726 mono digital camera (Carl Zeiss), and a Plan-Apochromat 63x/1.40 Oil DIC M27 objective.  
727 Images, acquired with the same camera settings, were processed with ZEN 2.5 (blue  
728 edition) microscope software in an identical manner, and imported into Adobe Illustrator. 10-  
729 15 animals were imaged per time point and biological replicate.

730

### 731 **Oil red O staining and analysis**

732 Oil red O staining was performed as published<sup>73</sup>. In brief, 0.5 g of Oil Red O powder was  
733 mixed in 100 ml isopropanol for 24 h, protected from direct light. This solution was diluted in

734 water to 60 %, stirred O/N, and sterile-filtered using a 0.22  $\mu\text{m}$  pore filter. Between 200-300  
735 day one-old animals were collected with 1 ml of M9 buffer and were washed once with M9.  
736 They were fixed in 75 % isopropanol for 15 min with gentle inversions every 3-4 minutes. 1  
737 ml of filtered 60 % ORO was added to the animals after the removal of isopropanol. Staining  
738 was performed for 6 h on a shaker with maximum speed, covered with aluminum foil.  
739 Stained animals were placed on 2 % agar pads and imaged. Imaging and image analysis  
740 were performed as described before <sup>17</sup>. Briefly, animals were imaged using a wide-field  
741 microscope Z1 (Carl Zeiss) using a 10x objective and a color camera AxioCam MRc (Carl  
742 Zeiss). RGB images were first corrected for shading in Zen Blue software (Carl Zeiss).  
743 Afterwards, images were analyzed using Fiji/ImageJ software suite <sup>72</sup>, stitched with the  
744 Grid/Collection stitching plug-in <sup>72</sup>, and corrected for white balance. After conversion from  
745 RGB to HSB color space, red pixels were selected by color thresholding. A binary mask was  
746 created with the Saturation channel and applied to the thresholded image. After conversion  
747 to 32-bit, zero pixel values were replaced by NaN. The mean intensity of all remaining pixels  
748 was used as a representation of the amount of red staining in the animals (Fiji/ImageJ macro  
749 available upon request). 10-15 animals were imaged per genotype and biological replicate. 2  
750 tailed t-test was used to assess significance with Graph Pad/Prism 8.

751

### 752 ***C. elegans* extract preparation**

753 Animals were collected in M9 buffer in a cold room, washed and resuspended in TBS pH 8.0  
754 (2000 worms in 50  $\mu\text{l}$  total volume) with proteinase inhibitors (EDTA-free, Roche) in protein  
755 LoBind tubes (Eppendorf). Probes were then homogenized at 4°C in Bioruptor Pico  
756 sonicator (Diagenode), using 30 sonication cycles (30 s on/off). After lysis confirmation, by  
757 microscopic inspection, probes were centrifuged for 2 h at 21130  $g$  at 4°C, and supernatants  
758 were transferred to fresh LoBind tubes. Total protein concentration in the soluble fraction  
759 was determined by UV absorbance (NanoDrop, Thermo Fisher Scientific). For ICP-MS



760 analysis, *C. elegans* extracts were diluted to 10 µg/µl concentration and transferred to 2 ml  
761 glass vials (ALWSCI technologies) with 50 µl glass inserts with bottom spring (Supelco) and  
762 kept at 4°C before the analysis.

763

#### 764 **Size exclusion chromatography inductively coupled plasma mass spectrometry**

765 All experiments were performed using a ICP-MS-2030 Inductively Coupled Plasma Mass  
766 Spectrometer (Shimadzu, Japan), directly coupled to a Prominence LC 20Ai inert system  
767 (Shimadzu, Japan)<sup>74</sup>. Time-Resolved Measurement (TRM) software for LC-ICP-MS was  
768 used for controlling both ICP and LC analytical systems. The ICP-MS operates at 1000 W,  
769 with an 8.0 ml min<sup>-1</sup> argon plasma gas flow, a 0.7 ml min<sup>-1</sup> Ar carrier gas flow, and a 1.0 ml  
770 min<sup>-1</sup> Ar auxiliary gas flow. The sampling depth was 5.0 mm, and the chamber temp. was  
771 set to 3°C. Optimized conditions of the collision cell were -90 V of cell gas voltage, 6.5 V of  
772 energy filter voltage, and a 9.0 ml min<sup>-1</sup> cell gas (He) flow rate. The separation was  
773 performed using BioSEC-5, 300A, 5 µm, 4.6x300 mm (Agilent, USA) column using 200 mM  
774 ammonium nitrate (99.999% trace metal basis, Sigma Aldrich) pH 8.0 (adjusted by NH<sub>4</sub>OH,  
775 Sigma Aldrich, Merck group, Poland) as the mobile phase with a flow rate 0.4 ml min<sup>-1</sup> and  
776 run time 10 min. In all measurements, a 10 µl sample loop was used. For iron content  
777 quantification in fractions after separation, ferritin (iron) from equine spleen – Type I  
778 standard (Sigma Aldrich) was diluted to 100, 250, 500, 1000 and 2000 µg L<sup>-1</sup> total metal  
779 concentration in mobile phase solution and used to create a standard calibration curve. Iron  
780 content in each fraction was normalized to peak area on the chromatogram. Total iron  
781 concentration was determined by direct sample injection (LC-ICP-MS) and quantification  
782 based on iron standard solution (Sigma Aldrich). The standard calibration curve was created  
783 using the same iron concentrations as for SEC-ICP-MS method.

784

#### 785 **Suspension culture of mouse neuronal stem cells (NSC) using neuronal cell spheres**

786 Entire heads of fetal mouse (C57BL/6; gestation day between E9-11) were isolated and the  
787 tissue was fragmented into pieces followed by incubation in Trypsin-EDTA (0.05 %) (Thermo  
788 Fisher Scientific, Waltham, USA) for 15 min at 37°C. The tissue was subsequently  
789 transferred to DMEM/10 % FCS and triturated by pipetting up and down into single-cell  
790 suspension. The cell suspension was transferred on adherent, uncoated tissue culture  
791 plates. After the 3 hour incubation in 5 % CO<sub>2</sub> at 37°C, the residual differentiated and non-  
792 neuronal cells readily attached to the bottom of the plate and the floating neuronal stem cells  
793 were collected. The neuronal cells were transferred on to low-adhesive 6-well plates, coated  
794 with Poly-HEMA (Poly 2-hydroxyethyl methacrylate; Sigma-Aldrich, St. Louis, USA) using  
795 DMEM medium (Thermo Fisher Scientific), supplemented with F-12 (Thermo Fisher  
796 Scientific), B-27 (Thermo Fisher Scientific), 100 ng/ml basic fibroblast growth factor (FGF-2,  
797 ORF Genetis, Kopavogur, Iceland), 100 ng/ml epidermal growth factor (EGF, ORF Genetis)  
798 and 5 µg/ml heparin (Sigma-Aldrich). After 1 day in culture (5 % CO<sub>2</sub>/5 % O<sub>2</sub>), the neuronal  
799 cells formed neuronal spheres, which were further cultured and passaged weekly using  
800 tissue chopper <sup>75</sup>.

801

#### 802 **Differentiation of NSC to noradrenergic neurons**

803 Neuronal spheres were differentiated towards noradrenergic neurons using available  
804 protocols <sup>76</sup>. The spheres were dissociated by chopping into small cell aggregates and  
805 plated onto glass coverslips coated with 0.05 mg/ml poly-D-lysine (Thermo Fisher Scientific)  
806 and 3.3 µg/ml laminin (Sigma-Aldrich). Cells were incubated for 5 days in Neurobasal  
807 Medium, supplemented with B-27 serum-free supplement, penicillin/streptomycin (all  
808 Thermo Fisher Scientific), and neurotrophic factors: 50 ng/ml BDNF, 30 ng/ml GDNF  
809 (Peprotech, UK), according to a modified protocol described elsewhere <sup>76</sup>.

810

#### 811 **Detection of NSC and mature neuronal markers**

812 Neuronal stem cell and noradrenergic neuronal cell identities were confirmed by PCR-based  
813 detection of neuronal stem cell (NSC) gene markers: *Sox2*, *Gbx2*, *Cd-81*, *Cdh1*, *S100b*,  
814 *Dach1*, *Pax6*, *Olig1*, or neural differentiation markers: *Cspg4*, *DβH*, *Darpp32*, *Nestin* (*NES*).  
815 Moreover the neuronal spheres were immunostained for neuronal stem cell markers: Nestin  
816 (1: 500; DSHB, Iowa, USA; <sup>77</sup>, Foxg-1 (1:100; Abcam, Cambridge, UK), Emx1 (1: 100;  
817 Millipore, Burlington, USA) and Emx2 (1:100; Abgent, San Diego, USA) and differentiated  
818 neurons for Th (1:100; Abcam), S100b (1:100; Abcam), DβH (1:500; Abcam), Darpp32  
819 (1:50; Abcam).

820

## 821 **Subcloning, lentivirus generation and transduction for Fth1 overexpression in mouse** 822 **noradrenergic-like neurons**

823 The mouse *Fth1* was introduced into neurons using lentiviral pLJM1 vector for EGFP fusion.  
824 pLJM1-EGFP was a gift from David Sabatini (Addgene plasmid # 19319;  
825 <http://n2t.net/addgene:19319>; RRID:Addgene\_19319) <sup>78</sup>. It co-expresses EGFP and a  
826 puromycin resistance, and allows for the visualization and selection of transductants carrying  
827 N-terminally EGFP-tagged *Fth1*. After RNA isolation from mouse brain tissue, the cDNA  
828 template was synthesized using NEBNext Second Strand Synthesis Enzyme Mix for ds  
829 cDNA and Phusion® High-Fidelity DNA Polymerase (M0530, NEB). For constitutive  
830 expression, the coding sequence of *Fth1* was PCR-amplified (using ProtoScript II  
831 Reaction/Enzyme Mix by New England BioLabs, Ipswich, USA).

832 The following primers with specific Gibson's overhangs were used:

833 mFth1overexpGibson\_F

834 (TCCGGACTCAGATCTCGAGCTCAAGCTTCGATGACCACCGCGTCTCCCTCG),

835 mFth1overexpGibson\_R

836 (GATGAATACTGCCATTTGTCTCGAGGTCGAGTTAGCTCTCATCACCGTGTCCC), and

837 cloned into EcoRI-digested lentiviral pLJM1::EGFP vector. Cloning and DNA preparations

838 were done using NEB® Stable Competent *E. coli* (C3040H), according to Gibson  
839 Assembly® protocol (NEB).

840 Lentiviral particles were assembled using a third-generation packaging system. The  
841 plasmid pLJM1::EGFP::Fth1 or "empty" pLJM1::EGFP vector, pMDL, pMD2.G and  
842 pRSV/REV were mixed (3:2:1:0.8), and human embryonic kidney 293 cells (HEK 293T) (3 ×  
843 10<sup>6</sup> cells seeded on T75 flask one day before) were transfected using a calcium phosphate  
844 protocol. Pseudoviral particles in neuronal maintenance medium were collected at 48 and 72  
845 h post-transfection and filtered through a 45 µm filter. The aliquots were snap-frozen and  
846 stored at -80°C. Transduction in neurons was done by replacing culture medium with one  
847 enriched in lentiviral particles (pLJM1::EGFP::Fth1 or empty pLJM1::EGFP), collected before  
848 and supplemented with polybrene (5 µg/mL). After 24 h incubation, medium was discarded  
849 and a new one with lentiviral vector was added for subsequent 24 h. At 48 h after  
850 transduction, the medium was replaced with fresh viral-free medium and, at 96 h post-  
851 transduction, selection with puromycin was initiated for further 48 hours.

852

### 853 **Cold treatment of noradrenergic-like neurons**

854 The assay was established using two independent humidified airtight cell culture incubators.  
855 One water-jacketed type incubator was additionally equipped with cooler unit (10°C) and the  
856 other incubator was set to 37°C. Both contained atmosphere control, which was set to 5 %  
857 CO<sub>2</sub>/5 % O<sub>2</sub>. If not stated otherwise, differentiated neuronal cultures were placed in a 10°C-  
858 incubator for 4 hours and then returned to the 37°C-incubator for additional 24 hours of  
859 rewarming. Such cooling/rewarming paradigm demonstrated a statistically relevant rise of  
860 cell death as early as 4 h into cooling, which was used in subsequent assays. To evaluate  
861 neuroprotective effects of compounds, neuronal culture medium was replaced with a  
862 Neurobasal medium, without neurotrophic factors supplemented with 100 µM deferoxamine  
863 (DFO concentration determined based on dose curve at 10°C) (Sigma-Aldrich), 100 nM

864 BAM15 (Tocris, Bristol, UK), 1:500 dilution of protease inhibitor cocktail III PI (Sigma-  
865 Aldrich). All compounds were provided as a single or as a combined treatment. The effects  
866 of antioxidants were tested by supplementation of neuronal maintenance medium with 50  
867  $\mu$ M Edaravone (Sigma-Aldrich), 50  $\mu$ M TEMPOL (Sigma-Aldrich), or 10  $\mu$ M N-Acetyl-L-  
868 cysteine NAC (Sigma-Aldrich), following procedures described above. Drugs concentration  
869 was determined based on dose curves at 10°C.

870

### 871 **Propidium iodide staining**

872 After 4 hours of cooling at 10°C, and additional 24 hours of rewarming at 37°C, neurons  
873 cultured on glass coverslips were incubated in the presence of 10  $\mu$ g/ml propidium iodide  
874 (PI) (Cayman Chemical, Ann Arbor, USA) diluted in phosphate-buffered saline (PBS), and  
875 costained with 1  $\mu$ g/ml Hoechst 33342 (Life Technologies) for 25 min at 37°C. Cells were  
876 then fixed in ice-cold 4 % buffered formaldehyde for 15 min, washed twice in PBS and  
877 placed in histology mounting medium (Sigma-Aldrich) on a glass slide. The prepared  
878 material was imaged using fluorescence microscope (Leica DMI 4000B, Germany) and LAS  
879 X SP8 software. Counting of total cells (blue nuclei) and necrotic cells (red-PI positive and  
880 round) was performed on 2-3 images from 3 coverslips as replicates. Collected data were  
881 statistically analyzed using Prism software (version 6.01 for Windows, La Jolla, CA).

882

### 883 **CellROX-green staining of ROS production**

884 To demonstrate whether cold-stabilizing drugs inhibit intracellular ROS levels, neurosphere-  
885 derived neurons were incubated with cell-permeable dye, CellROX Green Reagent (Life  
886 Technologies, Carlsbad, USA), at the final concentration of 5  $\mu$ M, according to the procedure  
887 described elsewhere <sup>46</sup>. Green fluorescence was emitted after dye binding to DNA, only  
888 upon its oxidation. In brief, murine neuronal cells were differentiated in 24-well plates on  
889 glass coverslips. Control cells (group 1) were maintained only at 37°C (non-cold control).

890 Other cells (group 2) were exposed for 4 hrs to 10°C, in the presence or absence of the  
891 following drugs: 100 µM DFO, 100 nM BAM15 and 1:500 dilution of protease inhibitor  
892 cocktail (PI). Subsequently, after 5 min rewarming at room temperature on the bench, ROS  
893 accumulation in neurons was assessed for both groups, by staining with fluorogenic Cell-  
894 ROX green reagent in the dark for 30 min at 37°C. Additionally, before cooling, reference  
895 neurons (for time 0) were labeled to detect fluorescent signal in initial precooling cultures. Z-  
896 stack well-focused confocal images at 0.55 µm intervals in the z-axis of 4 culture areas per  
897 each treatment and condition were collected for both groups. Maximal intensity projections  
898 of the Z stack images were produced for data analysis. Microscopy images were taken using  
899 a Leica TCS SP5 confocal microscope and LAS X SP8 software. The change in ROS  
900 production at 10°C incubated cells vs cells maintained only in 37°C was calculated using the  
901 following formula:  $(F_2 - F_1)/F_0 \times 100\%$ . The CellROX-green fluorescence of non-cold control  
902 cells ( $F_1$ ; mean intensity) was subtracted from CellROX-fluorescence at the end of cold  
903 treatment ( $F_2$ ; mean intensity). While  $F_0$  stands for the initial mean CellROX-green  
904 fluorescent intensity of culture areas before 10°C cooling.

905

#### 906 **Determination of iron(II) with FeRhoNox-1**

907 Intracellular iron levels were measured according to the manufacturer's protocol. Cells were  
908 cultured in a glass-bottom dish, and exposed to indicated agents in the cold. Next, cells were  
909 rinsed twice with HBSS, then 5 µM FeRhoNox™-1 solution (Goryo Chemical, Inc., Sapporo,  
910 Japan) was added and incubated in the dark at 37 °C for 1 h, and then washed twice with  
911 HBSS. To track changes in  $Fe^{2+}$  over time, after cooling neurons at 10 degrees, the probe  
912 signal was recorded at 1, 4 and 8 hours of rewarming. In turn, to examine iron(II) right after  
913 cooling (0 hour), incubation with the reagent was completed at the end of the 4-hour cold  
914 exposure. The FeRhoNox signal was visualized using a confocal microscope (Leica TCS  
915 SP5, Germany) and LAS X SP8 software. FeRhoNox-1 was excited at 543 nm and

916 measured at 570 nm. Fluorescence intensity of Z-stacked confocal images of neuronal  
917 culture (maximal intensity projection of 7 image z-stacks at 0.55  $\mu\text{m}$  intervals in the z-axis)  
918 was analyzed using ImageJ.

919

#### 920 **Neurite tracing**

921 Cultured neurons with, or without, DFO or BAM15/PI/DFO were fixed with 4 %  
922 paraformaldehyde, permeabilized and washed with 0.1 % Triton X-100 in phosphate-  
923 buffered saline, and stained by antibody against NEFH. NEFH<sup>+</sup> neurite paths were traced  
924 with the 'Simple Neurite Tracer' plugin <sup>79</sup>, ImageJ, using Z-stacked confocal images of  
925 neuronal culture (maximal intensity projection of 7 image z-stacks at 0.55  $\mu\text{m}$  intervals in the  
926 z-axis). Cumulative frequency plots of neurite lengths, for each experimental group, were  
927 built using GraphPad Prism version 6.01 for Windows, GraphPad Software, La Jolla  
928 California USA.

929

930

931 **REFERENCES**

- 932 1. Melvin, R.G. & Andrews, M.T. Torpor induction in mammals: recent discoveries  
933 fueling new ideas. *Trends Endocrinol Metab* **20**, 490-498 (2009).
- 934 2. Andrews, M.T. Molecular interactions underpinning the phenotype of hibernation in  
935 mammals. *J Exp Biol* **222** (2019).
- 936 3. Geiser, F. Hibernation. *Curr Biol* **23**, R188-193 (2013).
- 937 4. Wu, C.W. & Storey, K.B. Life in the cold: links between mammalian hibernation and  
938 longevity. *Biomol Concepts* **7**, 41-52 (2016).
- 939 5. Blanco, M.B., Dausmann, K.H., Faherty, S.L. & Yoder, A.D. Tropical heterothermy is  
940 "cool": The expression of daily torpor and hibernation in primates. *Evol Anthropol* **27**,  
941 147-161 (2018).
- 942 6. Cerri, M. The Central Control of Energy Expenditure: Exploiting Torpor for Medical  
943 Applications. *Annu Rev Physiol* **79**, 167-186 (2017).
- 944 7. Nordeen, C.A. & Martin, S.L. Engineering Human Stasis for Long-Duration  
945 Spaceflight. *Physiology (Bethesda)* **34**, 101-111 (2019).
- 946 8. Yenari, M.A. & Han, H.S. Neuroprotective mechanisms of hypothermia in brain  
947 ischaemia. *Nat Rev Neurosci* **13**, 267-278 (2012).
- 948 9. Kutcher, M.E., Forsythe, R.M. & Tisherman, S.A. Emergency preservation and  
949 resuscitation for cardiac arrest from trauma. *Int J Surg* **33**, 209-212 (2016).
- 950 10. Loeb, J. & Northrop, J.H. Is There a Temperature Coefficient for the Duration of Life?  
951 *Proc Natl Acad Sci U S A* **2**, 456-457 (1916).
- 952 11. Conti, B. *et al.* Transgenic mice with a reduced core body temperature have an  
953 increased life span. *Science* **314**, 825-828 (2006).
- 954 12. Frezal, L. & Felix, M.A. *C. elegans* outside the Petri dish. *Elife* **4** (2015).
- 955 13. Klass, M.R. Aging in the nematode *Caenorhabditis elegans*: major biological and  
956 environmental factors influencing life span. *Mech Ageing Dev* **6**, 413-429 (1977).
- 957 14. Xiao, R. *et al.* A Genetic Program Promotes *C. elegans* Longevity at Cold  
958 Temperatures via a Thermosensitive TRP Channel. *Cell* **152**, 806-817 (2013).
- 959 15. Ohta, A., Ujisawa, T., Sonoda, S. & Kuhara, A. Light and pheromone-sensing  
960 neurons regulates cold habituation through insulin signalling in *Caenorhabditis*  
961 *elegans*. *Nat Commun* **5** (2014).
- 962 16. Robinson, J.D. & Powell, J.R. Long-term recovery from acute cold shock in  
963 *Caenorhabditis elegans*. *BMC Cell Biol* **17**, 2 (2016).
- 964 17. Habacher, C. *et al.* Ribonuclease-Mediated Control of Body Fat. *Dev Cell* **39**, 359-  
965 369 (2016).



- 966 18. Murray, P., Hayward, S.A., Govan, G.G., Gracey, A.Y. & Cossins, A.R. An explicit  
967 test of the phospholipid saturation hypothesis of acquired cold tolerance in  
968 *Caenorhabditis elegans*. *Proc Natl Acad Sci U S A* **104**, 5489-5494 (2007).
- 969 19. Savory, F.R., Sait, S.M. & Hope, I.A. DAF-16 and Delta(9) Desaturase Genes  
970 Promote Cold Tolerance in Long-Lived *Caenorhabditis elegans* age-1 Mutants. *Plos*  
971 *One* **6** (2011).
- 972 20. Habacher, C. & Ciosk, R. ZC3H12A/MCPIP1/Regnase-1-related endonucleases: An  
973 evolutionary perspective on molecular mechanisms and biological functions.  
974 *Bioessays* **39** (2017).
- 975 21. Thyagarajan, B. *et al.* ETS-4 is a transcriptional regulator of life span in  
976 *Caenorhabditis elegans*. *PLoS Genet* **6**, e1001125 (2010).
- 977 22. Murphy, C.T. & Hu, P.J. Insulin/insulin-like growth factor signaling in *C. elegans*.  
978 *WormBook*, 1-43 (2013).
- 979 23. Riddle, D.L., Swanson, M.M. & Albert, P.S. Interacting genes in nematode dauer  
980 larva formation. *Nature* **290**, 668-671 (1981).
- 981 24. Ayyadevara, S., Alla, R., Thaden, J.J. & Reis, R.J.S. Remarkable longevity and  
982 stress resistance of nematode PI3K-null mutants. *Aging Cell* **7**, 13-22 (2008).
- 983 25. Tepper, R.G. *et al.* PQM-1 complements DAF-16 as a key transcriptional regulator of  
984 DAF-2-mediated development and longevity. *Cell* **154**, 676-690 (2013).
- 985 26. Senchuk, M.M. *et al.* Activation of DAF-16/FOXO by reactive oxygen species  
986 contributes to longevity in long-lived mitochondrial mutants in *Caenorhabditis*  
987 *elegans*. *Plos Genetics* **14** (2018).
- 988 27. Downen, R.H., Breen, P.C., Tullius, T., Conery, A.L. & Ruvkun, G. A microRNA  
989 program in the *C. elegans* hypodermis couples to intestinal mTORC2/PQM-1  
990 signaling to modulate fat transport. *Genes Dev* **30**, 1515-1528 (2016).
- 991 28. Rajan, M. *et al.* NHR-14 loss of function couples intestinal iron uptake with innate  
992 immunity in *C. elegans* through PQM-1 signaling. *Elife* **8** (2019).
- 993 29. O'Brien, D. *et al.* A PQM-1-Mediated Response Triggers Transcellular Chaperone  
994 Signaling and Regulates Organismal Proteostasis. *Cell Rep* **23**, 3905-3919 (2018).
- 995 30. Davis, C.A. *et al.* The Encyclopedia of DNA elements (ENCODE): data portal update.  
996 *Nucleic Acids Res* **46**, D794-D801 (2018).
- 997 31. Anderson, C.P. & Leibold, E.A. Mechanisms of iron metabolism in *Caenorhabditis*  
998 *elegans*. *Front Pharmacol* **5** (2014).
- 999 32. Muckenthaler, M.U., Rivella, S., Hentze, M.W. & Galy, B. A Red Carpet for Iron  
1000 Metabolism. *Cell* **168**, 344-361 (2017).
- 1001 33. Gourley, B.L., Parker, S.B., Jones, B.J., Zumbrennen, K.B. & Leibold, E.A. Cytosolic  
1002 aconitase and ferritin are regulated by iron in *Caenorhabditis elegans*. *J Biol Chem*  
1003 **278**, 3227-3234 (2003).

- 1004 34. Kim, Y.I., Cho, J.H., Yoo, O.J. & Ahnn, J. Transcriptional regulation and life-span  
1005 modulation of cytosolic aconitase and ferritin genes in *C. elegans*. *J Mol Biol* **342**,  
1006 421-433 (2004).
- 1007 35. Cha'on, U. *et al.* Disruption of iron homeostasis increases phosphine toxicity in  
1008 *Caenorhabditis elegans*. *Toxicol Sci* **96**, 194-201 (2007).
- 1009 36. Ackerman, D. & Gems, D. Insulin/IGF-1 and hypoxia signaling act in concert to  
1010 regulate iron homeostasis in *Caenorhabditis elegans*. *PLoS Genet* **8**, e1002498  
1011 (2012).
- 1012 37. Consortium, C.e.D.M. large-scale screening for targeted knockouts in the  
1013 *Caenorhabditis elegans* genome. *G3 (Bethesda)* **2**, 1415-1425 (2012).
- 1014 38. James, S.A. *et al.* Direct in vivo imaging of ferrous iron dyshomeostasis in ageing  
1015 *Caenorhabditis elegans*. *Chem Sci* **6**, 2952-2962 (2015).
- 1016 39. Theil, E.C. Ferritin: The Protein Nanocage and Iron Biomineral in Health and in  
1017 Disease. *Inorg Chem* **52**, 12223-12233 (2013).
- 1018 40. Halliwell, B. & Gutteridge, J.M. Oxygen toxicity, oxygen radicals, transition metals  
1019 and disease. *Biochem J* **219**, 1-14 (1984).
- 1020 41. Gutteridge, J.M. & Halliwell, B. Free radicals and antioxidants in the year 2000. A  
1021 historical look to the future. *Ann N Y Acad Sci* **899**, 136-147 (2000).
- 1022 42. Valentini, S. *et al.* Manipulation of in vivo iron levels can alter resistance to oxidative  
1023 stress without affecting ageing in the nematode *C. elegans*. *Mechanisms of Ageing*  
1024 *and Development* **133**, 282-290 (2012).
- 1025 43. Frokjaer-Jensen, C. *et al.* Single-copy insertion of transgenes in *Caenorhabditis*  
1026 *elegans*. *Nat Genet* **40**, 1375-1383 (2008).
- 1027 44. Wang, Y., Branicky, R., Noe, A. & Hekimi, S. Superoxide dismutases: Dual roles in  
1028 controlling ROS damage and regulating ROS signaling. *J Cell Biol* **217**, 1915-1928  
1029 (2018).
- 1030 45. Doonan, R. *et al.* Against the oxidative damage theory of aging: superoxide  
1031 dismutases protect against oxidative stress but have little or no effect on life span in  
1032 *Caenorhabditis elegans*. *Genes Dev* **22**, 3236-3241 (2008).
- 1033 46. Ou, J.X. *et al.* iPSCs from a Hibernator Provide a Platform for Studying Cold  
1034 Adaptation and Its Potential Medical Applications. *Cell* **173**, 851-+ (2018).
- 1035 47. Hudson, J.W. & Scott, I.M. Daily Torpor in the Laboratory Mouse, *Mus-Musculus Var*  
1036 *Albino*. *Physiol Zool* **52**, 205-218 (1979).
- 1037 48. Amemiya, S. *et al.* Anti-apoptotic and neuroprotective effects of edaravone following  
1038 transient focal ischemia in rats. *Eur J Pharmacol* **516**, 125-130 (2005).
- 1039 49. Feng, L.D. *et al.* Efficacy and safety of edaravone for acute intracerebral  
1040 haemorrhage: protocol for a systematic review and meta-analysis. *Bmj Open* **10**  
1041 (2020).

- 1042 50. Otomo, E. *et al.* Effect of a novel free radical scavenger, edaravone (MCI-186), on  
1043 acute brain infarction - Randomized, placebo-controlled, double-blind study at  
1044 multicenters. *Cerebrovasc Dis* **15**, 222-229 (2003).
- 1045 51. Cuzzocrea, S. *et al.* Beneficial effects of n-acetylcysteine on ischaemic brain injury.  
1046 *Brit J Pharmacol* **130**, 1219-1226 (2000).
- 1047 52. Ezerina, D., Takano, Y., Hanaoka, K., Urano, Y. & Dick, T.P. N-Acetyl Cysteine  
1048 Functions as a Fast-Acting Antioxidant by Triggering Intracellular H<sub>2</sub>S and Sulfane  
1049 Sulfur Production. *Cell Chem Biol* **25**, 447-+ (2018).
- 1050 53. Moss, H.G., Brown, T.R., Wiest, D.B. & Jenkins, D.D. N-Acetylcysteine rapidly  
1051 replenishes central nervous system glutathione measured via magnetic resonance  
1052 spectroscopy in human neonates with hypoxic-ischemic encephalopathy. *J Cerebr*  
1053 *Blood F Met* **38**, 950-958 (2018).
- 1054 54. Mehta, S.H., Webb, R.C., Ergul, A., Tawfik, A. & Dorrance, A.M. Neuroprotection by  
1055 tempol in a model of iron-induced oxidative stress in acute ischemic stroke. *Am J*  
1056 *Physiol Regul Integr Comp Physiol* **286**, R283-288 (2004).
- 1057 55. Wilcox, C.S. Effects of tempol and redox-cycling nitroxides in models of oxidative  
1058 stress. *Pharmacol Therapeut* **126**, 119-145 (2010).
- 1059 56. Biggar, K.K. *et al.* Modulation of Gene Expression in Key Survival Pathways During  
1060 Daily Torpor in the Gray Mouse Lemur, *Microcebus murinus*. *Genomics Proteomics*  
1061 *Bioinformatics* **13**, 111-118 (2015).
- 1062 57. Faherty, S.L., Villanueva-Canas, J.L., Blanco, M.B., Alba, M.M. & Yoder, A.D.  
1063 Transcriptomics in the wild: Hibernation physiology in free-ranging dwarf lemurs. *Mol*  
1064 *Ecol* **27**, 709-722 (2018).
- 1065 58. Wu, C.W. & Storey, K.B. FoxO3a-mediated activation of stress responsive genes  
1066 during early torpor in a mammalian hibernator. *Mol Cell Biochem* **390**, 185-195  
1067 (2014).
- 1068 59. Huang, H. & Salahudeen, A.K. Cold induces catalytic iron release of cytochrome P-  
1069 450 origin: a critical step in cold storage-induced renal injury. *Am J Transplant* **2**,  
1070 631-639 (2002).
- 1071 60. Rauen, U. *et al.* Cold-induced apoptosis of hepatocytes: Mitochondrial permeability  
1072 transition triggered by nonmitochondrial chelatable iron. *Free Radical Bio Med* **35**,  
1073 1664-1678 (2003).
- 1074 61. Balaban, R.S., Nemoto, S. & Finkel, T. Mitochondria, oxidants, and aging. *Cell* **120**,  
1075 483-495 (2005).
- 1076 62. Kell, D.B. Iron behaving badly: inappropriate iron chelation as a major contributor to  
1077 the aetiology of vascular and other progressive inflammatory and degenerative  
1078 diseases. *BMC Med Genomics* **2**, 2 (2009).
- 1079 63. Dixon, S.J. & Stockwell, B.R. The role of iron and reactive oxygen species in cell  
1080 death. *Nat Chem Biol* **10**, 9-17 (2014).
- 1081 64. Kelley, L.A., Mezulis, S., Yates, C.M., Wass, M.N. & Sternberg, M.J. The Phyre2 web  
1082 portal for protein modeling, prediction and analysis. *Nat Protoc* **10**, 845-858 (2015).

- 1083 65. Brenner, S. The genetics of *Caenorhabditis elegans*. *Genetics* **77**, 71-94 (1974).
- 1084 66. Arnold, A. *et al.* Functional characterization of C-elegans Y-box-binding proteins  
1085 reveals tissue-specific functions and a critical role in the formation of polysomes.  
1086 *Nucleic Acids Res* **42**, 13353-13369 (2014).
- 1087 67. Andrews, S. in FASTQC. A quality control tool for high throughput sequence data  
1088 (<http://www.bioinformatics.babraham.ac.uk/projects/fastqc>; 2010).
- 1089 68. Dobin, A. *et al.* STAR: ultrafast universal RNA-seq aligner. *Bioinformatics* **29**, 15-21  
1090 (2013).
- 1091 69. Lawrence, M. *et al.* Software for Computing and Annotating Genomic Ranges. *Plos*  
1092 *Comput Biol* **9** (2013).
- 1093 70. Hendriks, G.J., Gaidatzis, D., Aeschimann, F. & Grosshans, H. Extensive Oscillatory  
1094 Gene Expression during *C. elegans* Larval Development. *Mol Cell* **53**, 380-392  
1095 (2014).
- 1096 71. Gu, Z.G., Eils, R., Schlesner, M. & Ishaque, N. EnrichedHeatmap: an R/Bioconductor  
1097 package for comprehensive visualization of genomic signal associations. *Bmc*  
1098 *Genomics* **19** (2018).
- 1099 72. Schindelin, J. *et al.* Fiji: an open-source platform for biological-image analysis. *Nat*  
1100 *Methods* **9**, 676-682 (2012).
- 1101 73. O'Rourke, E.J., Conery, A.L. & Moy, T.I. Whole-animal high-throughput screens: the  
1102 *C. elegans* model. *Methods Mol Biol* **486**, 57-75 (2009).
- 1103 74. Karas, K., Ziola-Frankowska, A. & Frankowski, M. Chemical Speciation of Aluminum  
1104 in Wine by LC-ICP-MS. *Molecules* **25** (2020).
- 1105 75. Ebert, A.D. *et al.* EZ spheres: a stable and expandable culture system for the  
1106 generation of pre-rosette multipotent stem cells from human ESCs and iPSCs. *Stem*  
1107 *Cell Res* **10**, 417-427 (2013).
- 1108 76. Mahabadi, V.P., Movahedin, M., Semnanian, S., Mirnajafi-zadeh, J. & Faizi, M. In  
1109 Vitro Differentiation of Neural Stem Cells into Noradrenergic-Like Cells. *Int J Mol Cell*  
1110 *Med* **4**, 22-31 (2015).
- 1111 77. Hockfield, S. & McKay, R.D. Identification of major cell classes in the developing  
1112 mammalian nervous system. *J Neurosci* **5**, 3310-3328 (1985).
- 1113 78. Sancak, Y. *et al.* The Rag GTPases bind raptor and mediate amino acid signaling to  
1114 mTORC1. *Science* **320**, 1496-1501 (2008).
- 1115 79. Longair, M.H., Baker, D.A. & Armstrong, J.D. Simple Neurite Tracer: open source  
1116 software for reconstruction, visualization and analysis of neuronal processes.  
1117 *Bioinformatics* **27**, 2453-2454 (2011).

1118
